1 **Multi-omics analysis in human retina uncovers ultraconserved *cis*-regulatory**  
2 **elements at rare eye disease loci**

3

4 Victor Lopez Soriano<sup>\*1,2</sup>, Alfredo Dueñas Rey<sup>\*1,2</sup>, Rajarshi Mukherjee<sup>3</sup>, Genomics England Research  
5 Consortium<sup>4</sup>, Frauke Coppieters<sup>1,2,5</sup>, Miriam Bauwens<sup>1,2</sup>, Andy Willaert<sup>1,2</sup>, Elfride De Baere<sup>1,2</sup>

6 1- Department of Biomolecular Medicine, Ghent University, Ghent, Belgium.

7 2- Center for Medical Genetics, Ghent University Hospital, Ghent, Belgium.

8 3- Department of Ophthalmology, St James's University Hospital, Leeds, UK.

9 4- Genomics England, London, UK.

10 5- Department of Pharmaceutics, Ghent University, Ghent, Belgium.

11 \*equal contribution

12 Corresponding author: Elfride De Baere ([elfride.debaere@ugent.be](mailto:elfride.debaere@ugent.be))

13 Running title: Identification of ultraconserved CREs in retina

14

15 **ABSTRACT**

16 Cross-species genome comparisons have revealed a substantial number of ultraconserved non-coding  
17 elements (UCNEs). Several of these elements have proved to be essential tissue- and cell type-specific  
18 *cis*-regulators of developmental gene expression. Here, we characterized a set of UCNEs, as candidate  
19 CREs (cCREs) during retinal development and evaluate the contribution of their genomic variation to  
20 rare eye diseases, for which pathogenic non-coding variants are emerging. Integration of bulk and  
21 single-cell retinal multi-omics data revealed 594 genes under potential *cis*-regulatory control of UCNEs,  
22 of which 45 are implicated in rare eye disease. Mining of candidate *cis*-regulatory UCNEs in WGS data  
23 derived from the rare eye disease cohort of Genomics England revealed 178 ultrarare variants within  
24 84 UCNEs associated with 29 disease genes. Overall, we provide a comprehensive annotation of  
25 ultraconserved non-coding regions acting as cCREs during retinal development which can be targets of  
26 non-coding variation underlying rare eye diseases.

27 **KEYWORDS**

28 Ultraconserved non-coding elements (UCNEs), retina, single-cell, multi-omics, enhancer, *cis*-regulatory  
29 elements (CREs), genomic variation, rare eye disease.

30

## 31 INTRODUCTION

32 The 'dark matter of the genome' harbors functional *cis*-regulatory elements (CREs) such as promoters,  
33 enhancers, silencers, and insulators, whose orchestrated activity is essential to provide spatial and  
34 temporal patterns of gene expression that ensure proper tissue development and homeostasis (Field  
35 & Adelman, 2020; Spielmann & Mundlos, 2016). The influence of these regulatory elements on their  
36 target genes spans within architectural chromatin units known as topologically associating domains  
37 (TADs), demarcated by boundaries enriched in CTCF and cohesin proteins (Dixon et al., 2012). Due to  
38 their high context specificity, the annotation of candidate CREs (cCREs) poses an attractive yet  
39 challenging task. In this regard, the Encyclopedia of DNA Elements (ENCODE) (Abascal et al., 2020;  
40 Dunham et al., 2012) represents a powerful tool to characterize functional cCREs, as it provides a  
41 robust inventory of well-defined cCREs supported by epigenetic data derived from a wide variety of  
42 both human tissues and cell types.

43 Over the past decades, comparative genomics have been made progress to map functional cCREs by  
44 establishing cross-comparison between species. As a result, several databases of non-coding  
45 sequences that exhibit extremely high conservation have been generated, including UCEs (Bejerano et  
46 al., 2004; Lomonaco et al., 2014), UCNEs (Dimitrieva & Bucher, 2013), ANCORA (Engström et al., 2008)  
47 and CONDOR (Woolfe et al., 2007). One of the most comprehensive resources is UCNEbase, which  
48 comprises exclusively >200bp-long non-coding genomic regions that exhibit ≥95% sequence identity  
49 between human and chicken. In total, 4,135 regions across the genome comply with the criteria and  
50 are listed as ultraconserved non-coding elements (UCNEs). The vast majority of these highly  
51 constrained elements cluster around key developmental genes, such as *PAX6*, and have been long  
52 hypothesized to act as tissue-specific transcriptional regulators (Dimitrieva & Bucher, 2013;  
53 Polychronopoulos et al., 2017). Ultraconserved CREs have been shown to be consistently depleted of  
54 common variants (Drake et al., 2006; Snetkova, Ypsilanti, et al., 2021), indicating that purifying  
55 selection has shifted ultraconserved CRE-derived allele frequencies towards magnitudes similar to

56 those observed for missense variants (Drake et al., 2006), hence reinforcing that variation within these  
57 regions is more likely to have functional consequences.

58 Due to the wide implementation of whole genome sequencing (WGS) in human genetic studies and  
59 ambitious initiatives such as the 100,000 Genome Project (100kGP) launched by Genomics England  
60 (GEL) (Smedley et al., 2021), previously overlooked regions within the vast non-coding fraction of the  
61 genome have been investigated in patients with rare diseases and have shown an emerging role of  
62 non-coding variants in disease pathogenesis. Two remarkable examples of functional evidence of  
63 disease driven by disruption of conserved CREs can be found precisely in the rare eye disease field, in  
64 which mutations located within highly conserved non-coding regions have been linked to  
65 developmental defects. A first example is a *de novo* single nucleotide variant (SNV) in an  
66 ultraconserved enhancer (SIMO element) 150 kb downstream of an intact *PAX6* transcriptional unit,  
67 found in a case with aniridia (Bhatia et al., 2013). Second, tandem duplications within a gene desert  
68 downstream the *IRXA* cluster (Cipriani et al., 2017; Small et al., 2016) have been found in patients  
69 affected by North Carolina Macular Dystrophy (NCMD); the shared duplicated region harbors an  
70 enhancer element defined as UCNE that could act as a *cis*-regulator during retinal development (Van  
71 de Sompele et al., 2022).

72 The retina is a heterogeneous tissue composed of neuronal (rod and cone photoreceptors, bipolar  
73 cells, ganglion cells, horizontal cells, and amacrine cells) and non-neuronal cell types (astrocytes,  
74 Müller cells and resident microglia) that arise from the common pool of retinal progenitor cells (RPCs)  
75 (Turner et al., 1990; Turner & Cepko, 1988). This cellular complexity is the result of spatiotemporally  
76 controlled gene expression programs during retinal development, requiring concerted action of  
77 thousands of CREs. In the wide spectrum of retinopathies, inherited retinal diseases (IRD) represent a  
78 leading cause of early-onset vision impairment affecting over 2 million people worldwide. Despite  
79 targeted panel-based sequencing and whole exome sequencing (WES)-based genetic testing 30-50%  
80 of IRD cases remain unsolved (Ellingford et al., 2016; Haer-Wigman et al., 2017), raising the hypothesis

81 that disease-causing mutations are found in the non-coding genome that are mostly not covered by  
82 standard genetic testing.

83 In this study we set out to annotate UCNEs as cCREs that modulate gene expression during retinal  
84 development and that can play a role in retinopathies such as IRD. Firstly, we performed a  
85 comprehensive integration of publicly available multi-omics datasets derived from human retina based  
86 on biochemical features associated with regulation of gene expression. Secondly, UCNEs co-localizing  
87 with genomic regions showing regulatory activity were linked to target genes that exhibit expression  
88 in the retina. Finally, we evaluated the contribution of genomic variation within these regions to rare  
89 eye diseases. This allowed us to identify an ultrarare SNV in a candidate *cis*-regulatory UCNE located  
90 upstream *PAX6* in a family displaying autosomal dominant foveal abnormalities. Overall, this work has  
91 improved the functional annotation of UCNEs in human retina representing understudied targets of  
92 non-coding variation that may explain missing heritability in rare eye diseases.

## 93 **RESULTS**

### 94 **Integration of bulk and single-cell multi-omics data enables the identification of 1,487** 95 **UCNEs with a candidate *cis*-regulatory role in human retina**

96 The wealth of publicly available data allowed the integration of transcriptomic (bulk and scRNA-seq)  
97 and epigenomic (DNase-seq, scATAC-seq, ChIP-seq) data to evaluate the regulatory capacity of UCNEs  
98 over the major developmental stages of human retina (Fig. 1A). More specifically, to identify which  
99 UCNEs might have a potential *cis*-regulatory role, an intersection was performed with genomic regions  
100 characterized by an open chromatin context in the retina at different developmental stages, as  
101 supported either by DNase (ENCODE) or scATAC-seq (Thomas et al., 2022) peaks. This resulted in a  
102 total of 1,487 UCNEs, i.e., approximately one third of UCNEs display a retinal open context (Fig. 1B,  
103 Supplementary Table 1). Approximately 80% of the DNase-seq peaks were also supported by scATAC-  
104 seq, hence defining high-confidence candidate *cis*-regulatory UCNEs (Fig. 1B). Nevertheless, to account  
105 for differences in time points between datasets, all 1,487 UCNEs were included in downstream

106 analyses. Apart from the display of a retinal open chromatin context, we also evaluated the overlap  
 107 between UCNEs and genomic regions featured by markers associated with regulation of gene  
 108 expression. A total of 834 UCNEs were found to display at least one of the assessed features in the  
 109 interrogated retinal developmental stages; more specifically 111 UCNEs were identified to display the  
 110 active enhancer mark H3K27ac, of which most (95%) also exhibit other histone marks related to active  
 111 enhancers (H3K4me1 and H3K4me2) (Fig. 1B). Table 1 and Supplementary Table 2 include summarized  
 112 and detailed overviews of the number of identified UCNEs per marker and stage, respectively.

113 To investigate the functional relevance of the putative regulatory UCNEs, we performed a correlation  
 114 with the 1,942 experimentally validated human non-coding fragments of the VISTA Enhancer Browser  
 115 (Fig. 1C). Out of these 1,942 elements, approximately 50% (998/1,942) display enhancer activity. When  
 116 overlapped with all 4,135 UCNEs, a slight increase of positive elements (505/922) is observed;  
 117 however, when only the identified retinal accessible UCNEs were considered, roughly 68% were found  
 118 to be positive (272/402), thereby reinforcing their predicted regulatory role (Fig. 1C). Interestingly,  
 119 evaluation of the anatomical description of the reporter gene expression patterns of these 272  
 120 elements revealed a potential enrichment in eye (Fig. 1D). An illustrative example of one of these  
 121 elements and its corresponding multi-omics-based characterization is shown in Fig. 1E-F.

122 **Table 1. Overview of the number of events based on the peak identification for each marker at the**  
 123 **different stages of retinal differentiation.** Abbreviations: FW: fetal weeks.

124

| ChIP-seq  | Stage   |         |         |         | Total Unique |
|-----------|---------|---------|---------|---------|--------------|
|           | FW13/14 | FW15/16 | FW18/20 | FW23/24 |              |
| H3K27ac   | 73      | 45      | 74      | 94      | 127          |
| H3K4me1   | 235     | 490     | 48      | 323     | 582          |
| H3K4me2   | 347     | 354     | 256     | 225     | 465          |
| H3K4me3   | 94      | 124     | 102     | 97      | 136          |
| H3K27me3  | 119     | 54      | 128     | 126     | 154          |
| H3K9/14Ac | 51      | 76      | 36      | 31      | 94           |
| H3K9me3   | 0       | 1       | 1       | 29      | 29           |
| PoIII     | 17      | 66      | 59      | 55      | 106          |
| CTCF      | 51      | 69      | 22      | 37      | 71           |

**A Annotation of ultraconserved non-coding regions acting as candidate *cis*-regulatory elements**

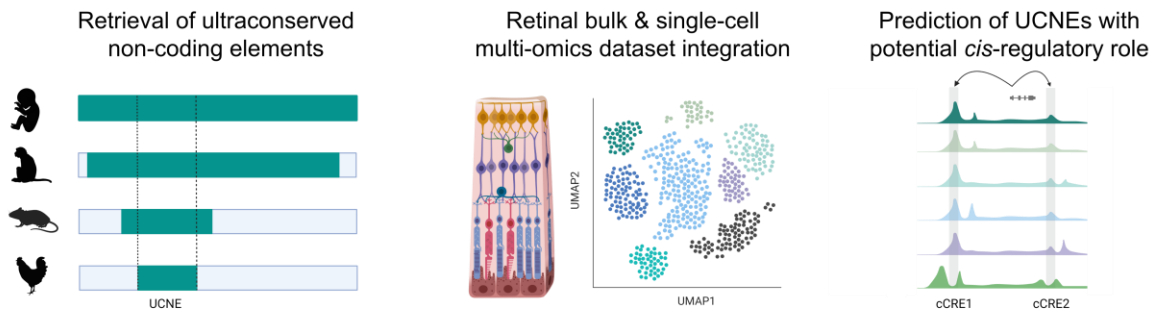

**B**

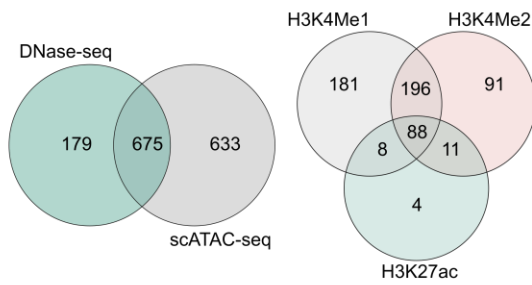

**C**

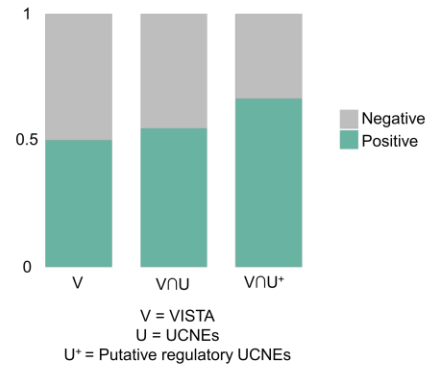

**D**

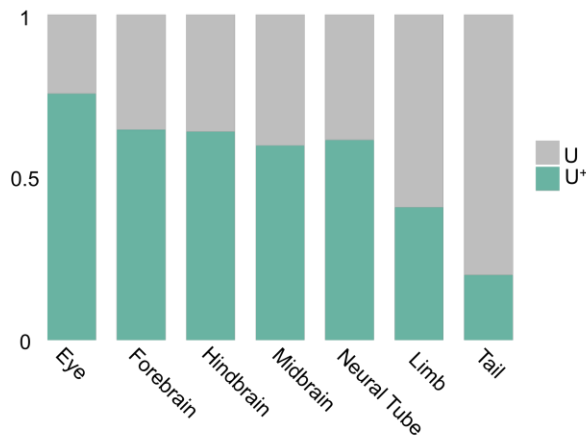

**E**

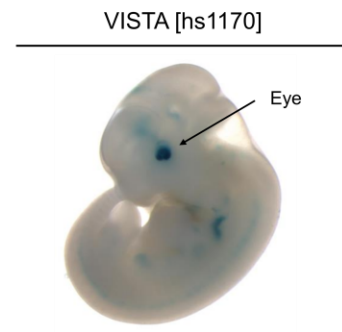

**F**

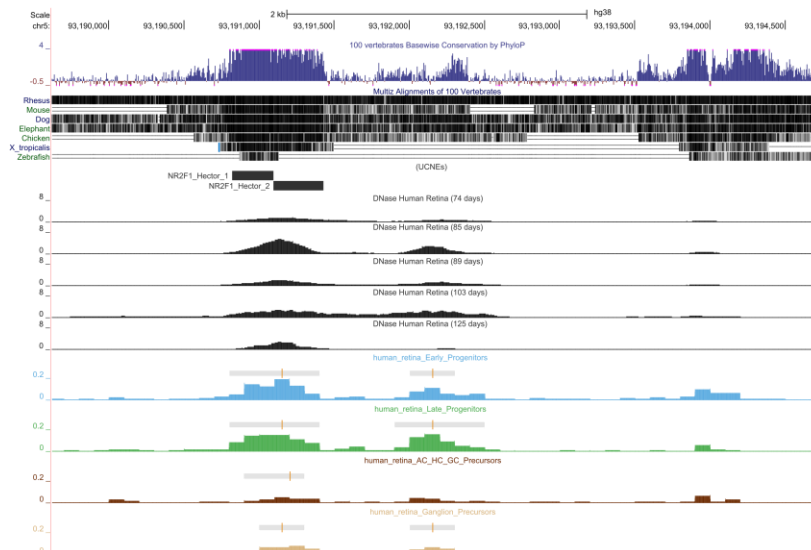

126 **Figure 1. Integration of publicly available datasets for the characterization of the ultraconserved**  
127 **non-coding elements (UCNEs) library. A)** Overview of the integrative multi-omics analysis for the  
128 prediction of UCNEs with potential *cis*-regulatory role in human retina. **B)** Venn diagrams illustrating  
129 the CREs displaying open chromatin features based on scATAC-seq and DNase-seq (left) and their  
130 overlap of active enhancer marks (H3K27ac, H3K4me1 and H3K4me2). **C)** Barplot showing the  
131 proportions of elements from the VISTA enhancer browser (V), UCNEs (U), and putative regulatory  
132 UCNEs (characterized by retinal datasets) (U<sup>+</sup>) displaying reporter expression (positive). **D)**  
133 Proportional stacked barplot showing the distribution of tissues (eye, forebrain, hindbrain, midbrain,  
134 neural tube, limb and tail) in which the putative regulatory UCNEs display reporter expression. **E-F)**  
135 Illustration of one of the characterized UCNEs (NR2F1\_Hector\_1/2) displaying open chromatin  
136 supported by DNase-seq (embryonic day 74-85, 89 and 103-125) and scATAC-seq (AC/HC/GC  
137 Precursors Cells, Early Progenitor Cells, Ganglion Precursor Cells, Late Retinal Progenitor Cells) and  
138 enhancer reporter expression in the eye. Figures obtained from the UCSC VISTA (hs1170) enhancer (E)  
139 and genome (F) browsers. Abbreviations: FW: fetal weeks; V: VISTA enhancer elements; U: UCNEs; U<sup>+</sup>:  
140 Putative active regulatory UCNE; ∩: intersection.

141

## 142 ***In silico* prediction and integration of retinal chromatin conformation data identify putative** 143 **target genes under UCNE *cis*-regulation**

144 We annotated the identified active UCNEs to assign them potential target genes and thus assess their  
145 association with active gene expression in the retina. A total of 724 target genes were assigned to the  
146 initially identified 1,487 UCNEs displaying candidate *cis*-regulatory activity. The vast majority (74.5%)  
147 of queried regions were assigned as putatively regulating two genes based on the used association rule  
148 (Fig. 2A). Furthermore, most of these regions were found to be located at 50-500kb from the TSS of  
149 the regulated target genes regardless of their orientation (Fig. 2B). Out of these 724 target genes, 594  
150 (81.9%) are expressed in the retina in at least one of the interrogated developmental stages (52 to 136  
151 days post-conception). To evaluate further whether chromatin contacts between the UCNEs and the  
152 promoters of their target genes can occur in retina, we integrated the 2,948 retinal TADs identified by  
153 Marchal et al. (Marchal et al., 2022). A large majority (393/594) of the target genes were found to be  
154 in TADs also harboring their associated UCNE (Supplementary Table 1). These genes were then used  
155 as input for Gene Ontology analysis, which revealed an overrepresentation of terms related to  
156 regulation of gene expression and differentiation, thereby confirming the expected roles of UCNEs as  
157 tissue-specific CREs during development, particularly of the nervous system (Fig. 2C).



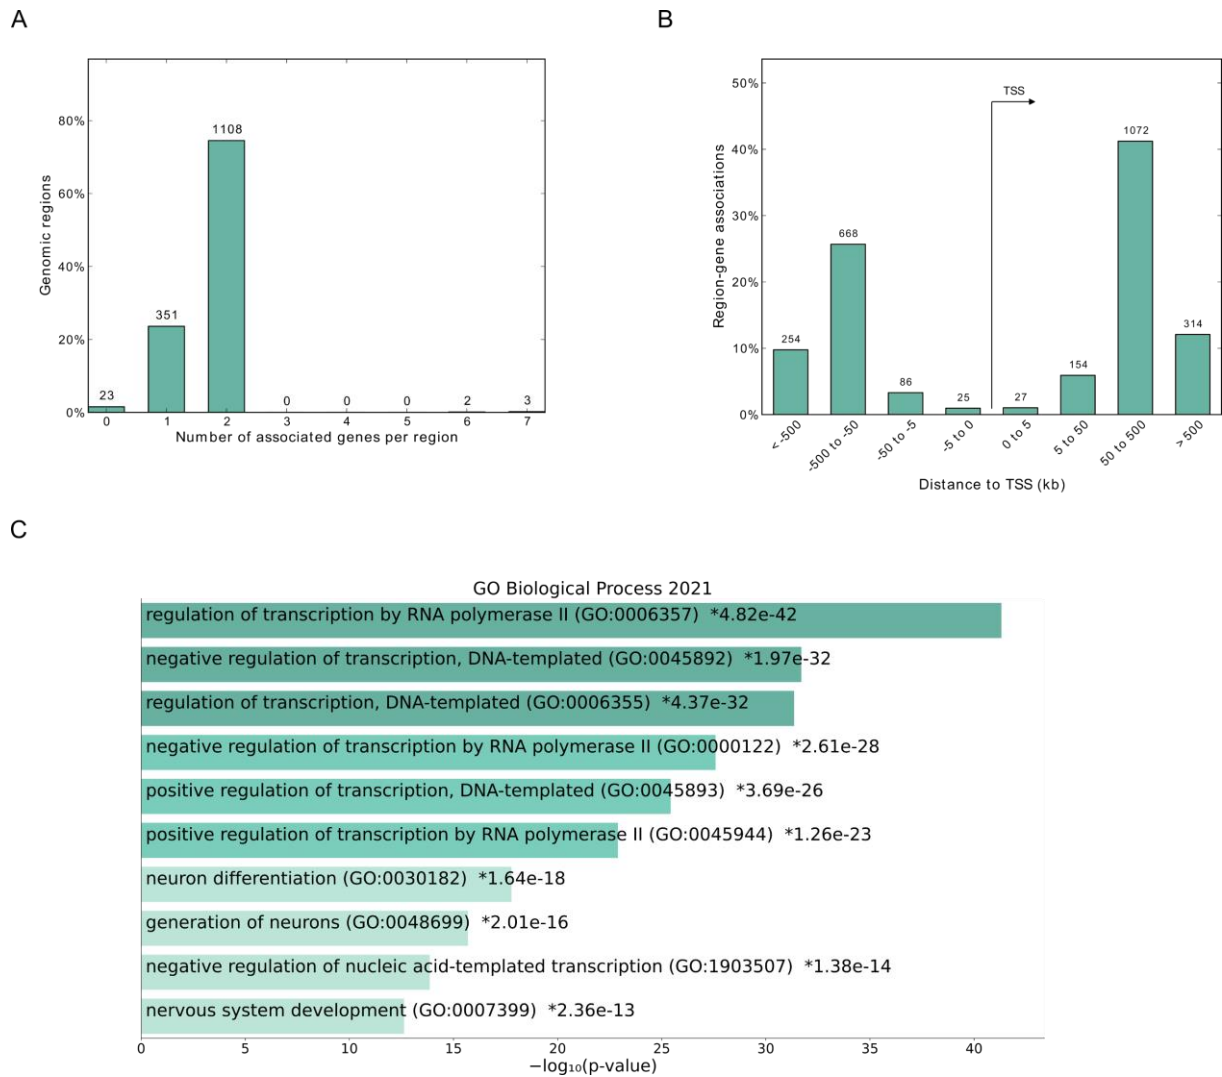

158

159 **Figure 2. Target genes under putative regulation of characterized UCNEs in retina. A)** Bar plot showing  
 160 the number of associated genes per retinal UCNE. **B)** Distance distribution from the TSS and its  
 161 associated UCNE. **C)** Gene ontology for the UCNE-associated target genes. Abbreviations: GO: Gene  
 162 Ontology; TSS: transcription start site.

163

164 As a last layer of characterization of these active UCNEs and their candidate target genes, we assigned  
 165 to each target gene cell-type specificity information based on expression data. Out of the 1,487 active  
 166 UCNEs, 808 (54.3%) displayed a cell-type specific open chromatin context consistent with their target  
 167 gene(s) expression signature(s) (Supplementary Table 1).

168 **Mining of WGS data from a rare eye disease cohort reveals rare variants within active UCNEs**

169 Out of the 594 putative target genes under UCNE *cis*-regulation, 45 were found to be previously linked  
 170 to a rare eye disease phenotype, of which 19 are also associated with other developmental disorder

171 phenotypes (Supplementary Table 4). Considering the extreme selective constraints of UCNEs, we  
172 hypothesized that genetic changes in these regions could contribute to disease. Therefore, we  
173 evaluated the genomic variation within the active UCNEs associated with these 45 disease genes in a  
174 sub-cohort of individuals affected by rare eye diseases (n = 3,220, Supplementary Table 5) from the  
175 100,000 Genomes Project (Fig. 3A).

176 As expected, a depletion of common variation (MAF>1%) was observed across these regions (Fig. 3B).  
177 A total of 431 (426 SNVs and 5 SVs) ultrarare variants, i.e., absent from reference population public  
178 databases, were identified in 199 active UCNEs linked to these 45 genes (Supplementary Table 6).  
179 Notably, out of the 5 identified SVs, one corresponds to the known shared duplicated region  
180 downstream of *IRX1*, located within the NCMD-linked *MCDR3* locus [MIM: 608850]; in particular, this  
181 duplication, identified in 8 affected individuals of 4 different families, involves a UCNE exhibiting  
182 chromatin accessibility in developing horizontal cells. Finally, out of these ultrarare variants, 178 are  
183 located within 84 UCNEs displaying histone modification marks (in at least one of the interrogated  
184 stages), associated with 29 genes. This set defined our primary search space for variants with potential  
185 functional effects and further assessment.

A

**Mining of variants within candidate *cis*-regulatory UCNEs in WGS data of a rare eye disease cohort**

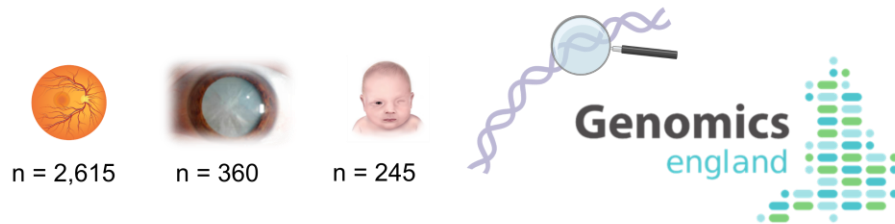

B

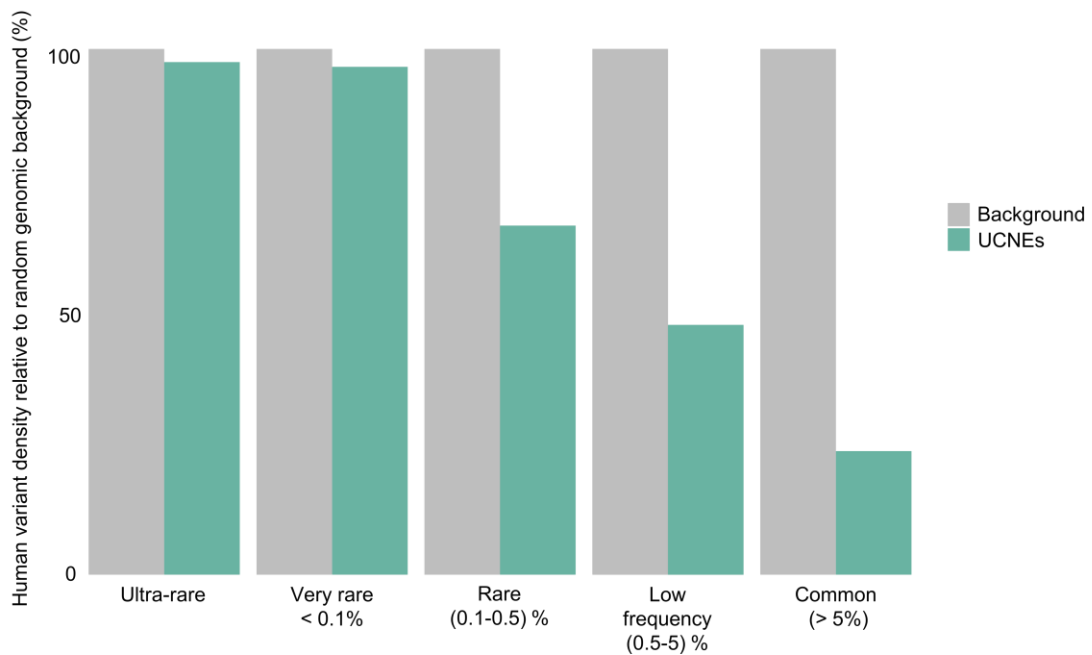

186

187

188 **Figure 3. Contribution of UCNE genomic variation to missing heritability in rare eye diseases. A)**  
 189 Overview of a sub-cohort comprising n=3,220 participants of the 100,000 Genomes Project affected  
 190 by posterior segment abnormalities (n=2,615), anterior segment abnormalities (n=360), and ocular  
 191 malformations (n=245). **B)** Variant population frequencies within putative retinal UCNEs normalized to  
 192 a background composed of randomly selected sequences (see Methods).

193

194 **An ultrarare SNV in an active UCNE upstream of *PAX6* found in a family segregating**  
 195 **autosomal dominant foveal anomalies**

196 We identified an ultrarare SNV (chr11:31968001T>C) within a candidate *cis*-regulatory UCNE located  
 197 ~150kb upstream of *PAX6*. This variant was found in four individuals of a family segregating autosomal  
 198 dominant foveal abnormalities (Fig. S1A-B; Supplementary Table 7). A *CFH* missense variant  
 199 (c.1187A>G, p.Asn396Ser) was initially reported in the affected individuals but could not explain the

200 foveal anomaly. Given the phenotype, a variant screening was performed with a particular focus on  
201 the *PRDM13* and *IRX1* NCMD loci, both associated with foveal or macular mis-development. A total of  
202 three and two SNVs within the *IRX1* and *PRDM13* loci respectively were found to segregate with  
203 disease. However, these SNVs are present in individuals from reference population databases and are  
204 not located in genomic regions displaying *cis*-regulatory features (Supplementary Table 8). Equally, loci  
205 associated with foveal hypoplasia, nystagmus and hypopigmentation (*AHR*, *FRMD7*, *GPR143*, and  
206 *SLC38A8*) were assessed for SNV or SV segregating with disease. No other (likely) pathogenic variants  
207 in these loci or any other known IRD/rare eye disease gene were identified in the affected cases  
208 (Supplementary Table 8).

209 The identified chr11:31968001T>C variant affects a nucleotide residue that is conserved for at least  
210 360 million years of evolution that separate humans from *X. tropicalis*. *In silico* assessment of this  
211 variant and flanking sequence pointed to a likely deleterious effect and revealed a predicted disruption  
212 of several TF binding motifs (Supplementary Table 8\_2). More specifically, this variant is located within  
213 a UCNE that is catalogued as a cCRE in ENCODE and featured by distal enhancer-like signatures in  
214 bipolar neurons (EH38E1530321). Regarding its retinal context, this UCNE displays accessible  
215 chromatin in the early stages of retinal development (7/8 gestational weeks), and in particular in  
216 ganglion cell precursors (Fig. 4A-B). Importantly *PAX6* is expressed within this pool of cells and,  
217 interestingly, this expression appears to be enriched within a specific sub-population, as observed from  
218 the distribution of expression values across all the cells composing this cluster (Fig. S2). Additionally,  
219 this UCNE was found to display the active enhancer mark H3K4Me1 at the earliest time points available  
220 for this dataset (13/14 and 15/16 gestational weeks).

A

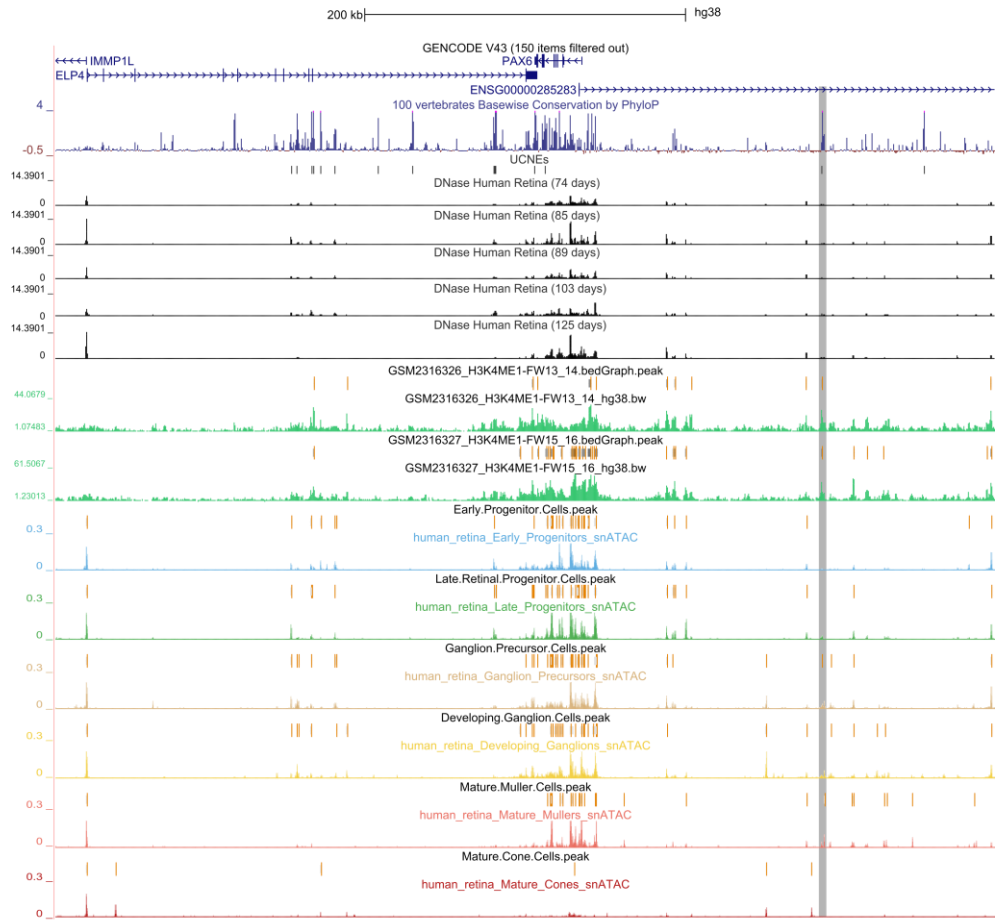

B

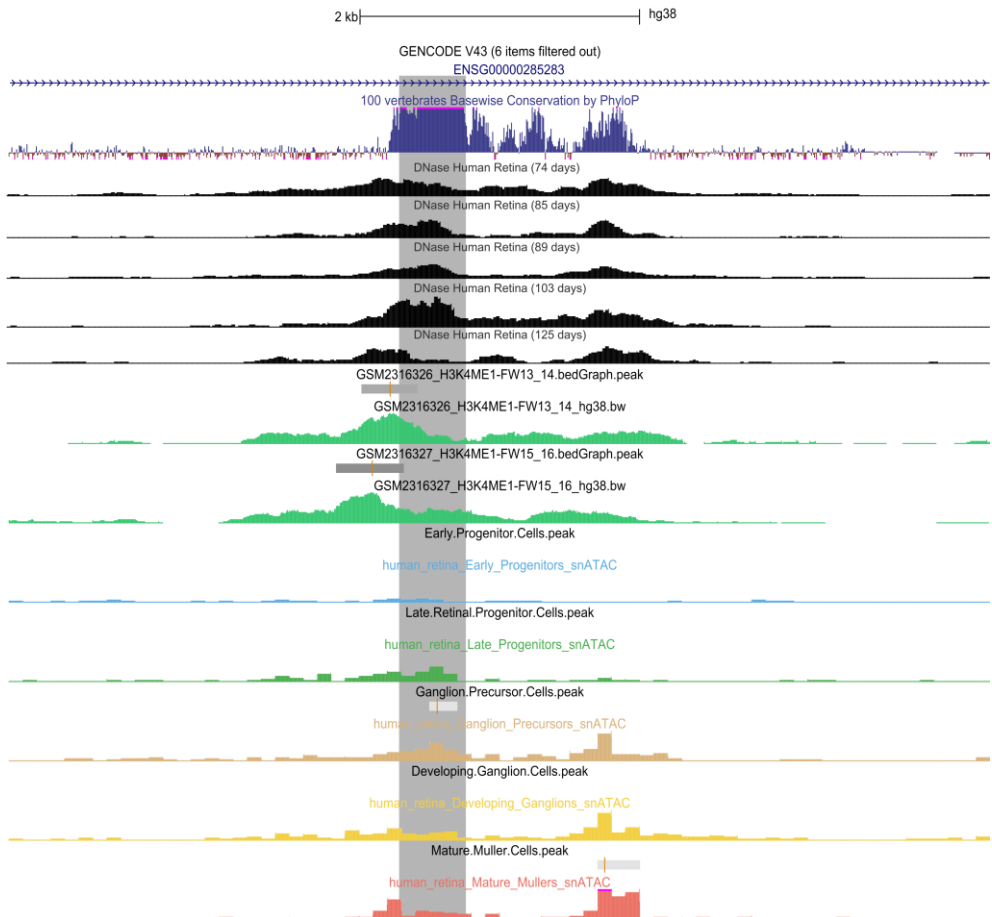

222 **Figure 4. Characterization of the *cis*-regulatory landscape of *PAX6* in human retina. A)** Visualization  
223 of the epigenomic context of the identified *PAX6*-associated UCNE (highlighted in *gray*) in relation to  
224 the *PAX6* locus (*top*; chr11:31,490,261-32,075,591) and **B)** zoomed-in of the identified element  
225 (*bottom*; chr11:31,965,000-31,972,000). Figures are obtained from the UCSC genome browser.

226

227 This region has also been functionally validated in transgenic mouse assays (VISTA element hs855),  
228 which revealed gene enhancer activity mainly in the forebrain and, to some extent, in the retina (3/6  
229 embryos) (Fig. 5A). A closer assessment of this UCNE with regard to its proximity to the *PAX6* promoter  
230 in other species revealed its syntenic conservation up to zebrafish; interestingly, this element localized  
231 in closer proximity to the *PAX6* promoter in species like *X. tropicalis* (60kb distance from the TSS) or  
232 *Danio rerio* (15kb distance from the *pax6a* TSS) (Fig. S3).

233 ***In vivo* enhancer assays in zebrafish display retinal activity for the active UCNE upstream of**  
234 ***PAX6***

235 Given the putative retinal activity suggested by the VISTA enhancer assay for this UCNE, we performed  
236 zebrafish enhancer assays to gain further insights into its regulatory range of action. We found  
237 consistent reporter expression in several regions, including the forebrain, hypothalamus/otic vesicle,  
238 somites, nosepit and eye. Importantly, we observed that the GFP expression in the eye initiated in a  
239 small fraction of the embryos at 2 dpf (4/22 GFP<sup>+</sup> embryos) increasing to a larger proportion of the  
240 embryos by 3 dpf (21/22 GFP<sup>+</sup> embryos) and eventually disappeared from 4 dpf (Fig. 5B). A detailed  
241 overview of the results of these assays can be found in Supplementary Table 10. Altogether, these  
242 observations are consistent with the epigenomic characterization based on retinal datasets and  
243 provides further evidence of a potential *cis*-regulatory role of this UCNE on *PAX6* expression.

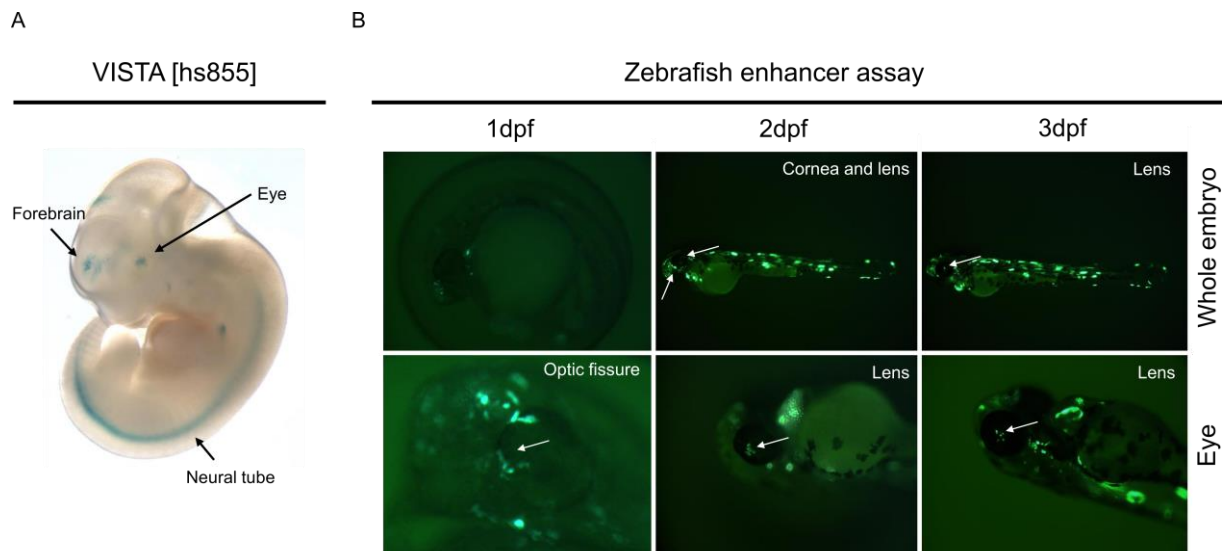

244

245 **Figure 5. *In vivo* evaluation of the *PAX6*-associated UCNE. A)** This UCNE displays reporter activity in  
 246 the human embryonic forebrain (6/9 embryos) as well as in other structures including eye (3/6  
 247 embryos) and neural tube. Figure obtained from the VISTA enhancer browser (hs855). **B)** Zebrafish  
 248 enhancer assays at 3 different time points (1 dpf, 2 dpf, 3 dpf) showing GFP-positive tissues (optic  
 249 fissure -1 dpf-, lens cells -2,3 dpf- and forebrain -2,3 dpf-; *white arrows*). Abbreviations. dpf: days post-  
 250 fertilization.

251

## 252 DISCUSSION

253 Since the landmark study of Bejerano et al. (Bejerano et al., 2004) almost twenty years ago,  
 254 ultraconservation of non-coding elements and their paradoxical functional (in)dispensability (Ahituv et  
 255 al., 2007; Chiang et al., 2008; Dickel et al., 2018; Drake et al., 2006; Snetkova, Pennacchio, et al., 2021)  
 256 have equally stirred controversy and fascination among scientists from diverse disciplines. A recent  
 257 study demonstrated that UCNEs with robust enhancer activity during embryonic development appear  
 258 to be unexpectedly resilient to mutation (Snetkova, Pennacchio, et al., 2021). There are, however, clear  
 259 instances in which variation within ultraconserved CREs can be a driver of human disease (Benko et al.,  
 260 2009; Bhatia et al., 2013; Ghiasvand et al., 2011; Klopocki et al., 2008; Kvon et al., 2020; Lettice et al.,  
 261 2003; Martínez et al., 2010; Plaisancié et al., 2018; Wiczorek et al., 2010). Despite the substantial  
 262 body of literature on these intriguing elements, thus far there are no comprehensive studies based on  
 263 the integration of multi-omics to map the regulatory capacity of UCNEs in a specific tissue or cells, and  
 264 on human genetic data to assess their contribution to disease. Apart from a few well-known examples,

265 variants in CREs are an underrepresented cause of Mendelian diseases. A major obstacle hampering  
266 their identification is the need to define the search space of the CREs they affect in a tissue- and even  
267 cell-type specific manner. Here we set out to address this challenge in human retina, of which the *cis*-  
268 regulatory architecture has been well-studied (Cherry et al., 2020; Marchal et al., 2022; Thomas et al.,  
269 2022) and for which there is emerging *cis*-regulatory variation implicated in disease (Bhatia et al., 2013;  
270 Ghasvand et al., 2011; Plaisancié et al., 2018; Van de Sompele et al., 2022).

271 Although ENCODE provides a well-annotated inventory of cCREs, its retinal datasets do not include the  
272 earliest stages of RPC differentiation. To overcome this and to incorporate cell-type specificity  
273 information, we integrated scATAC-seq, which allowed us to identify 1,487 UCNEs characterized by  
274 accessible chromatin in at least one major stage of retinal development. We also interrogated the  
275 epigenetic landscape of these elements by analyzing histone modification patterns associated with e.g.  
276 active/poised enhancers (H3K27ac, H3K4me1, H3K4me2) (Creyghton et al., 2010; Rada-Iglesias et al.,  
277 2011; Santos-Rosa et al., 2002) and highly packed chromatin (H3K27me2 and H3K27me3) (Juan et al.,  
278 2016). This analysis provided a useful approach to trace the activity of elements that are active at a  
279 specific stage during retinal development. In total, 111 UCNEs were found to display active enhancer  
280 marks during retinal development. Similarly to ENCODE, the analyzed ChIP-seq datasets do not cover  
281 the earliest stages and hence these 111 elements are more likely to be related to stages of  
282 differentiation corresponding to later-born cell types (i.e., rod photoreceptors, bipolar cells, Müller  
283 glial, and some varieties of amacrine cells) (Rapaport et al., 2004). Overall, our data integration spans  
284 all the major stages of retinogenesis and thus provides a comprehensive framework for the systematic  
285 characterization of ultraconserved retinal CREs.

286 Establishing an association between cCREs and their putative target genes is essential for the  
287 interpretation of genomic variation that could disrupt cell type-specific binding sites of TFs and/or long-  
288 range chromatin contacts that can lead to ectopic expression of genes (de Bruijn et al., 2020; Lupiáñez  
289 et al., 2015). Here we combined GREAT (McLean et al., 2010) with retinal expression and Hi-C derived  
290 retinal data to assign a range of action to candidate *cis*-regulatory UCNEs. In total, 594 retina-expressed



291 genes can be under UCNE *cis*-regulation; interestingly most of the UCNEs were found to be distributed  
292 in distal position from the TSS of their assigned target genes, as observed for enhancers promoting  
293 expression of developmental genes (Benko et al., 2009; Long et al., 2020; Pachano et al., 2022). In this  
294 regard, a large fraction of the identified ultraconserved putative enhancers clusters around key  
295 developmental genes (e.g. *MAB21L2*, *OTX2*, *PAX6*, *SOX2*, *ZEB2*) known to be controlled by complex  
296 regulatory landscapes (Polychronopoulos et al., 2017). Besides, 45 of these genes are implicated in  
297 rare eye diseases. Interestingly, coding variants in these genes lead in most cases to syndromic  
298 developmental phenotypes with other manifestations apart from the ocular ones as collated in the  
299 G2P database <sup>23</sup>. As has been shown before, the phenotype caused by a coding mutation of a  
300 developmental gene can be different from the phenotype caused by a mutation in a CRE controlling  
301 spatiotemporal expression of this gene. This is exemplified by the *PRDM13* locus, for which bi-allelic  
302 coding *PRDM13* variants result in hypogonadotropic hypogonadism and perinatal brainstem  
303 dysfunction in combination with cerebellar hypoplasia (Whittaker et al., 2021) while *cis*-regulatory  
304 variants in retinal CREs leads to NCMD, a developmental macular disease (Van de Sompele et al., 2022).  
305 From our analyses we could identify a cCRE for *PRDM13* that displays an open chromatin context in  
306 early RPCs and developing amacrine cells, which are precisely the retinal cell types in which *PRDM13*  
307 is expressed (Goodson et al., 2018; Watanabe et al., 2015). Although no disease associations have been  
308 established thus far for other genes for which we identified candidate *cis*-regulatory UCNEs, some of  
309 them are known to play important roles in retina development, e.g., *NFIB* (Clark et al., 2019), and  
310 therefore represent potential target regions for non-coding variants contributing to missing  
311 heritability.

312 A limitation of this analysis is the usage of a pre-defined set of genomic regions, in particular UCNEs,  
313 as this database is static and rarely updated (Polychronopoulos et al., 2017). Our approach could thus  
314 be expanded using more flexible criteria, thus including other less conserved, albeit disease-relevant  
315 loci (Ghiasvand et al., 2011). Nonetheless, the advantage of working with highly conserved genomic  
316 regions is the availability of already validated experimental data (Visel et al., 2007); additionally, as

317 shown here, the integration of tissue-specific epigenomic data provides a robust framework to identify  
318 potential *bona fide* enhancers and their corresponding target genes, and clinically relevant variants  
319 therein.

320 To further investigate the contribution of genomic variation within candidate *cis*-regulatory UCNEs to  
321 disease, we mined WGS data from a sub-cohort of 100,000 Genome Project Genomics England  
322 participants affected by different rare eye diseases. As reported previously (Katzman et al., 2007;  
323 Snetkova, Pennacchio, et al., 2021), we observed a substantial depletion of common variation across  
324 these regions when compared to a background comprising randomly selected genomic regions. This  
325 apparently strong purifying selection has been proven difficult to reconcile with recent findings  
326 demonstrating remarkable resilience of UCNEs to variation (Snetkova, Ypsilanti, et al., 2021).  
327 Moreover, it has been suggested that weaker but uniform levels of purifying selection across hundreds  
328 of bases and different species could bring together these otherwise contradictory observations and  
329 explain why rare variants are not significantly depleted within UCNEs (Dukler et al., 2022). Our primary  
330 search space for variants with potential functional effects comprised 178 ultrarare variants located  
331 within 84 retina-active UCNEs associated with 29 genes. Interestingly, most of them were predicted to  
332 have a likely functional and/or deleterious effect, which could be explained by a skewed cumulative  
333 importance towards evolutionary conservation-related features in the predictive models (Rogers et  
334 al., 2018; Schwarz et al., 2019; Shi et al., 2021; Zhou & Troyanskaya, 2015).

335 Out of all variants found, one ultrarare variant (chr11:31968001T>C) within a UCNE displaying open  
336 chromatin in progenitor ganglion cells and linked to *PAX6* was further dissected. This variant was  
337 exclusively found within the studied family, displaying isolated foveal abnormalities, and initially solved  
338 with an ultrarare missense variant in *CFH*, which could not fully explain the clinical presentation  
339 (Raychaudhuri et al., 2011; Taylor et al., 2019). As no other likely pathogenic variants were found  
340 within relevant loci (Ehrenberg et al., 2021; Kuht et al., 2020, 2022; Small et al., 2016; Van de Sompele  
341 et al., 2022), and the observed phenotypes of the affected individuals match within the *PAX6* disease  
342 spectrum, mis-regulation of *PAX6* expression cannot be excluded as a pathogenetic mechanism.

343 Genetic defects of *PAX6* have been found in aniridia, a pan-ocular disorder characterized by the  
344 absence or hypoplasia of the iris, nystagmus and foveal hypoplasia (Cunha et al., 2019), the latter  
345 comprising thinning of macular inner and outer retinal layers consistent with misdirected foveal  
346 development (Pedersen et al., 2020). Recently, a phenotype characterized by isolated foveal  
347 hypoplasia with nystagmus has been also linked to *PAX6* variation (Lima Cunha et al., 2021). Given the  
348 known inter- and intra-familial phenotypic variability observed in *PAX6*-associated disorders (Dubey et  
349 al., 2015; Yokoi et al., 2016), variable expressivity cannot be discarded for the identified variant. Thus  
350 far, in terms of regulatory variation in CREs, only a single SNV located within the ultraconserved SIMO  
351 element has been associated with *PAX6*-disease. This subtle change (SNV), identified *de novo* in an  
352 individual with aniridia and foveal hypoplasia, was found to disrupt an autoregulatory *PAX6* binding  
353 site (Bhatia et al., 2013). Importantly, we could establish *in vivo*, using the zebrafish as animal model,  
354 a developmental expression pattern in the eye driven by this UCNE in tissues for which *PAX6* expression  
355 is relevant (Ashery-Padan et al., 2000; Collinson et al., 2003; Georgala et al., 2011; Kimura et al., 2005;  
356 Pituello et al., 1999) and within a time window consistent with the period in which the zebrafish retina  
357 has become fully laminated (Morris & Fadool, 2005; Schmitt & Dowling, 1999). However, to confirm  
358 the association of this UCNE and impact of the identified variant on *PAX6* expression, further functional  
359 assays are needed. The phenotypic consequence of the variant itself, nevertheless, constitutes a  
360 limitation for modelling since currently no suitable models, including retinal organoids, fully  
361 recapitulate foveal patterning (Hussey et al., 2022).

362 Overall, our work is exemplar for how the wealth of publicly available multi-omics data can be used to  
363 exploit the regulatory capacity of UCNEs in a tissue- and cell type-specific way. As demonstrated here,  
364 UCNEs can represent understudied regions of non-coding variation underlying missing heritability in  
365 Mendelian diseases. With the increasing implementation of WGS in rare disease research and  
366 diagnosis, the delineation of tissue and cell type-specific CREs will be a prerequisite to identify and fully  
367 interpret the pathogenic nature of non-coding variants. With this study, we have illustrated how the  
368 creation of a comprehensive set of functionally annotated UCNEs in a target tissue can represent a

369 powerful initial strategy to narrow down the variant search space, particularly for developmental  
370 phenotypes.

## 371 **METHODS**

### 372 **Integration of UCNEs with bulk and single-cell epigenomic, regulatory and transcriptional** 373 **datasets from human developing and adult retina**

374 The 4,135 genomic regions defined as UCNEs (Dimitrieva & Bucher, 2013) were used as the basis for  
375 the integration of multiple publicly available multi-omics datasets derived from embryonic and adult  
376 human retina. More specifically, to evaluate the potential function of UCNEs as *cis*-regulatory modules,  
377 we made use of DNase-seq (Abascal et al., 2020), ChIP-seq of histone modifications (Aldiri et al., 2017),  
378 and single-cell (sc) ATAC-seq (Thomas et al., 2022) derived from retinal tissue collected at distinct  
379 stages of development. Furthermore, to correlate potential *cis*-regulatory activity with gene  
380 expression, we mined both bulk (Hoshino et al., 2017) and scRNA-seq (Thomas et al., 2022) generated  
381 at stages overlapping or extending the ones of the epigenomic datasets. Additionally, as a last layer of  
382 functional characterization, we integrated into our analyses the experimental data of the VISTA  
383 Enhancer Browser (Visel et al., 2007), which allows the classification of candidate regulatory elements  
384 based on *in vivo* enhancer reporter assays tested in transgenic mice at embryonic day 11.5 (Pennacchio  
385 et al., 2006).

### 386 **Identification of candidate *cis*-regulatory UCNEs in retina**

387 Data generated by scATAC-seq of embryonic (53, 59, 74, 78, 113, and 132 days) and adult (25, 50, and  
388 54 years old) human retinal cells were obtained (GSE183684) and imported into R (v4.0.5). Count  
389 matrices were processed using the *ArchR* single-cell analysis package (v1.0.1) (Granja et al., 2021) as  
390 described in Thomas et al., 2022(Thomas et al., 2022) with minor modifications. Briefly, the total  
391 number of cells after filtering out doublets was 61,313. Single-nucleus RNA-seq of the same tissue and  
392 timepoints (GSE183684) were integrated using the unconstrained integration method. Both datasets

393 were then used to assign retinal cell class identities to the different clusters and subsequent peak  
394 calling. BigWig files from each annotated cell cluster were extracted and converted into bedGraph files  
395 using *bigWigtoBedGraph* UCSC utility; peak detection was performed using *bdgpeakcall* (MACS2.2.7.1)  
396 (Zhang et al., 2008) with default parameters and a value of 0.4 as cut-off. Similarly, bigWig files  
397 corresponding to histone modification patterns (H3K27Ac, H3K27me3, H3K36me3, H3K4me1,  
398 H3K4me2, H3K4me3, H3K9/14Ac, H3K9me3, PolII, CTCF) were retrieved (GSE87064) and converted  
399 into bedGraph files; in this case, the cut-off value for peak calling by *bdgpeakcall* was set at 20.  
400 Additionally, the subset of ENCODE DNase hypersensitivity sites (rDHSs) identified in embryonic retina  
401 (74-85, 89, 103-105 days) were obtained (ENCSR786VSQ, ENCSR666FML, ENCSR632UXV) and elements  
402 featured by *Low-DNase* filtered out. Finally, to identify putative *cis*-regulatory UCNEs, we screened for  
403 overlaps between UCNEs and the retrieved sc-ATAC/ChIP/DNase-seq peaks using *bedtools intersect*  
404 (*BEDTools* (2.30.0)(Quinlan & Hall, 2010) with default parameters; of note *bedtools window* including  
405 a  $\pm 250$ bp-long window was used when overlapping the ChIP-seq peaks to characterize more broadly  
406 the chromatin status in the vicinity of the accessible UCNEs (Fig. S3).

#### 407 **Identification and characterization of target genes under active UCNE regulation**

408 To assign potential target genes to the identified active UCNEs we used the Genomic Regions  
409 Enrichment of Annotations Tool (*GREAT*) (McLean et al., 2010). Briefly, each gene in the genome was  
410 assigned a basal regulatory domain (5kb and 1kb upstream and downstream of the transcription start  
411 site {TSS}, respectively) with an extension of up to 1Mb to the nearest gene's basal domain. Curated  
412 regulatory domains were also included. Each active UCNE was then associated with all genes whose  
413 regulatory region it overlaps.

414 Potential target genes were subsequently filtered based on retinal expression. To do so, we retrieved  
415 RNA-seq paired-end FASTQ files derived from fetal retina samples (52 to 136 days post-conception)  
416 characterized in Hoshino et al. (Hoshino et al., 2017). Transcripts were quantified through pseudo-  
417 alignment by *Kallisto* (v.0.46.1)(Bray et al., 2016) using default parameters for both index build (derived

418 from the Ensembl human release 101) and transcript abundance estimation. A custom R script was  
419 then used to filter out target genes exhibiting no expression (TPM<0.5) at any of the interrogated  
420 stages. Additionally, to evaluate the reliability of the regulatory domains assigned by *GREAT* to these  
421 target genes, we integrated the 2,948 retinal TADs described by Marchal et al. (Marchal et al., 2022).  
422 To characterize further the putatively regulated target genes, we made use of the integration of the  
423 scATAC-seq gene score and the scRNA-seq gene expression matrices generated previously. For each  
424 target gene, its expression was ranked by percentile of expression across all clusters. A gene expression  
425 signature was then assigned by retrieving the cluster identities exhibiting an expression value above  
426 the 80<sup>th</sup> percentile threshold.

427 Finally, to identify overrepresented Gene Ontology (GO) terms and infer possible enriched pathways  
428 among the potential target genes under UCNE regulation, GO enrichment analyses were performed  
429 using *Enrichr* (Xie et al., 2021).

#### 430 **Interrogation of WGS data in a rare eye disease cohort**

431 Active UCNEs associated with genes expressed in retina were filtered further based on their implication  
432 in disease as retrieved from the comprehensive *gene-disease pairs and attributes* list provided by G2P  
433 (Eye and Developmental Disease –DD– Panels; 2022-03-17) (Lenassi et al., 2021; Thormann et al., 2019)  
434 extended with the NCMD-associated *IRX1* locus (Small et al., 2016). To assess the contribution of  
435 genomic variation within these loci to disease, an analysis was performed to detect small variants  
436 (SNVs, and indels < 50bp), large structural variants (SVs) including copy number variants (CNVs)  
437 overlapping these disease-gene associated UCNE loci through query of a sub-cohort of participants  
438 with rare eye disease phenotypes (n = 3,220) from the 100,000 Genomes Project (100KGP, Genomics  
439 England).

440 Retrieved variants were annotated with VEP (v.107). As a first filter, only variants with filtering allele  
441 frequency <0.5% and no observed homozygotes in gnomAD v3.1 were considered for further  
442 assessment. Variants were evaluated for their potential pathogenic/modifying effect using *in silico*

443 prediction tools focusing on transcription factor (TF) binding site disruption -QBiC-Pred- and chromatin  
444 state effects -DeepSea, CARMEN, FATHMM-XF, RegulationSpotter. Furthermore, we annotated these  
445 variants with our integrated analyses in order to evaluate them within their regulatory context and  
446 potential target genes.

447 For each candidate variant, we compared the similarities between the participant phenotype (HPO  
448 terms) and the ones known for its target gene through literature search and clinical assessment by the  
449 recruiting clinician when possible. Finally, for each candidate variant identified in participants whose  
450 cases were not solved through 100KGP, a variant screening of known retinal disease genes (Genomics  
451 England Retinal Disorder panel)(Martin et al., 2019) was performed to discard (likely) pathogenic  
452 variants, both SNVs and SVs, that could provide an alternative molecular diagnosis. For each instance  
453 for which only the UCNE variant remained as candidate, we placed a clinical collaboration request with  
454 Genomics England.

#### 455 **Targeted sequencing and reverse phenotyping**

456 We performed segregation testing of two ultrarare SNVs initially identified in three affected individuals  
457 of a 3-generation family displaying autosomal dominant foveal abnormalities, namely an SNV in a  
458 candidate *cis*-regulatory UCNE located upstream of *PAX6* and a missense *CFH* variant. Genomic DNA  
459 was extracted using Oragene-DNA saliva kits (OG-500, DNA Genotek) according to manufacturer's  
460 instructions. Targeted sequencing of the variants was performed on genomic DNA by PCR amplification  
461 followed by Sanger sequencing using the BigDye Terminator v3.1 kit (Life Technologies). Primer  
462 sequences can be found in Supplementary Table 9.

463 Following their genetic assessment, four members of this 3-generation family were clinically re-  
464 evaluated. The examination included visual acuity assessment, slit-lamp examination for anterior and  
465 posterior segment anomalies, and intraocular pressure measurement. Detailed imaging involving  
466 ultra-wide field fundus photography, ultra-wide field autofluorescence imaging and optical coherence  
467 tomography (OCT) was performed.

468 **Generation of *in vivo* reporter constructs and functional characterization of candidate *cis*-**  
469 **regulatory UCNE upstream of *PAX6* using enhancer assays in zebrafish embryos**

470 Primers were designed to amplify the sequence of the candidate *cis*-regulatory UCNE located upstream  
471 of *PAX6* from human genomic DNA (Roche). The PCR product was then cloned into the E1b-GFP-Tol2  
472 enhancer assay vector containing an E1b minimal promoter followed by the Green Fluorescent Protein  
473 (GFP) reporter gene(Li et al., 2010) by restriction-ligation cloning. The primer sequences can be found  
474 in Supplementary Table 9. The recombinant vector containing the cCRE-*PAX6*-UCNE was then amplified  
475 in One Shot TOP10 Chemically Competent *E. coli* cells (Invitrogen) and purified using the QIAprep Spin  
476 Miniprep Kit (Qiagen). The sequence of the insert was confirmed by Sanger sequencing using the  
477 BigDye Terminator v3.1 kit (Life Technologies). The constructs were then microinjected into the yolk  
478 of at least 70 wild-type zebrafish embryos at single-cell stage using the Tol2 transposase system for  
479 germline integration of the transgene according to Bessa *et al.* (Bessa et al., 2009) with minor  
480 modifications. As readout, GFP fluorescence was observed and photographed with a Leica M165 FC  
481 Fluorescent Stereo Microscope (Leica Microsystems) and its localization annotated at 1, 2 and 3 days  
482 post fertilization (dpf) to evaluate enhancer activity.

483

484

485

486

487

488

489

490

491



492 **COMPETING INTEREST STATEMENT**

493 The authors declare that they have no competing interests.

494 **FUNDING**

495 This work was supported by the Ghent University Special Research Fund (BOF20/GOA/023) (EDB);  
496 H2020 MSCA ITN grant (No. 813490 StarT) (EDB, FC, MB), EJPRD19-234 Solve-RET (EDB). EDB is a Senior  
497 Clinical Investigator (1802220N) of the Research Foundation-Flanders (FWO); VLS and ADR are an Early  
498 Starting Researcher of StarT (grant No. 813490). EDB is member of ERN-EYE (Framework Partnership  
499 Agreement No 739534-ERN-EYE).

500 **ACKNOWLEDGEMENTS**

501 This research was made possible through access to the data and findings generated by the 100,000  
502 Genomes Project. The 100,000 Genomes Project is managed by Genomics England Limited (a wholly  
503 owned company of the Department of Health and Social Care). The 100,000 Genomes Project is funded  
504 by the National Institute for Health Research and NHS England. The Wellcome Trust, Cancer Research  
505 UK and the Medical Research Council have also funded research infrastructure. The 100,000 Genomes  
506 Project uses data provided by patients and collected by the National Health Service as part of their  
507 care and support. We acknowledge Chris Inglehearn (Leeds Institute of Medical Research, School of  
508 Medicine, University of Leeds, Leeds, UK) for his helpful advice and comments for the manuscript. We  
509 also would like to thank the Zebrafish Facility Ghent (ZFG) Core at Ghent University. Hanna De Saffel,  
510 Quinten Mahieu, Angelika Jürgens and Lies Vantomme are thanked for their excellent technical  
511 assistance.

512 **ETHICS APPROVAL AND CONSENT TO PARTICIPATE**

513 The 100,000 Genomes Project Protocol has ethical approval from the HRA Committee East of England  
514 – Cambridge South (REC Ref 14/EE/1112). This study was registered with Genomics England under  
515 Research Registry Projects 465.

516 **AUTHORS' CONTRIBUTIONS**

517 V.L.S.: Conception and project design, acquisition of data, analysis and interpretation of data, drafting  
518 and revising the manuscript.

519 A.D.R.: Conception and project design, acquisition of data, analysis and interpretation of data, drafting  
520 and revising the manuscript.

521 R.M: Acquisition of data, analysis and interpretation of data, revising the manuscript.

522 G.E: Acquisition of data, revising the manuscript.

523 F.C: Acquisition of data, revising the manuscript.

524 M.B: Project supervision, acquisition of data, revising the manuscript.

525 A.W: Acquisition of data, analysis and interpretation of data, revising the manuscript.

526 E.D.B.: Conception and project supervision, acquisition of data, analysis and interpretation of data,  
527 drafting and revising the manuscript.

528 **CONSENT FOR PUBLICATION**

529 Not applicable. We present only de-identified data.

530 **AVAILABILITY OF DATA AND MATERIALS**

531 The data that support the findings of this study are available within the Genomics England (protected)  
532 Research Environment but restrictions apply to the availability of these data, as access to the Research  
533 Environment is limited to protect the privacy and confidentiality of participants. De-identified data as  
534 well as analysis scripts are, however, available from the authors upon reasonable request. Extended  
535 data generated in this study are available in the supplementary materials.

536 **REFERENCES**

- 537 Abascal, F., Acosta, R., Addleman, N. J., Adrian, J., Afzal, V., Aken, B., Akiyama, J. A., Jammal, O. Al, ...  
538 Zimmerman, J. (2020). Expanded encyclopaedias of DNA elements in the human and mouse  
539 genomes. *Nature*, *583*(7818), 699–710. <https://doi.org/10.1038/s41586-020-2493-4>
- 540 Ahituv, N., Zhu, Y., Visel, A., Holt, A., Afzal, V., Pennacchio, L. A., & Rubin, E. M. (2007). Deletion of  
541 ultraconserved elements yields viable mice. *PLoS Biology*, *5*(9), 1906–1911.  
542 <https://doi.org/10.1371/journal.pbio.0050234>
- 543 Aldiri, I., Xu, B., Wang, L., Chen, X., Hiler, D., Griffiths, L., Valentine, M., Shirinifard, A., ... Dyer, M. A.  
544 (2017). The Dynamic Epigenetic Landscape of the Retina During Development, Reprogramming,  
545 and Tumorigenesis. *Neuron*, *94*(3), 550-568.e10. <https://doi.org/10.1016/j.neuron.2017.04.022>
- 546 Ashery-Padan, R., Marquardt, T., Zhou, X., & Gruss, P. (2000). Pax6 activity in the lens primordium is  
547 required for lens formation and for correct placement of a single retina in the eye. *Genes and*  
548 *Development*, *14*(21), 2701–2711. <https://doi.org/10.1101/gad.184000>
- 549 Bejerano, G., Pheasant, M., Makunin, I., Stephen, S., Kent, W. J., Mattick, J. S., & Haussler, D. (2004).  
550 Ultraconserved elements in the human genome. *Science*, *304*(5675), 1321–1325.  
551 <https://doi.org/10.1126/science.1098119>
- 552 Benko, S., Fantès, J. A., Amiel, J., Kleinjan, D. J., Thomas, S., Ramsay, J., Jamshidi, N., Essafi, A., ...  
553 Lyonnet, S. (2009). Highly conserved non-coding elements on either side of SOX9 associated  
554 with Pierre Robin sequence. *Nature Genetics*, *41*(3), 359–364. <https://doi.org/10.1038/ng.329>
- 555 Bessa, J., Tena, J. J., De La Calle-Mustienes, E., Fernández-Miñán, A., Naranjo, S., Fernández, A.,  
556 Montoliu, L., Akalin, A., ... Gómez-Skarmeta, J. L. (2009). Zebrafish Enhancer Detection (ZED)  
557 vector: A new tool to facilitate transgenesis and the functional analysis of cis-regulatory regions  
558 in zebrafish. *Developmental Dynamics*, *238*(9), 2409–2417. <https://doi.org/10.1002/dvdy.22051>
- 559 Bhatia, S., Bengani, H., Fish, M., Brown, A., Divizia, M. T., De Marco, R., Damante, G., Grainger, R., ...  
560 Kleinjan, D. A. (2013). Disruption of autoregulatory feedback by a mutation in a remote,  
561 ultraconserved PAX6 enhancer causes aniridia. *American Journal of Human Genetics*, *93*(6),  
562 1126–1134. <https://doi.org/10.1016/j.ajhg.2013.10.028>
- 563 Bray, N. L., Pimentel, H., Melsted, P., & Pachter, L. (2016). Near-optimal probabilistic RNA-seq  
564 quantification. *Nature Biotechnology*, *34*(5), 525–527. <https://doi.org/10.1038/nbt.3519>
- 565 Cherry, T. J., Yang, M. G., Harmin, D. A., Tao, P., Timms, A. E., Bauwens, M., Allikmets, R., Jones, E. M.,  
566 ... Greenberg, M. E. (2020). Mapping the cis-regulatory architecture of the human retina reveals  
567 noncoding genetic variation in disease. *Proceedings of the National Academy of Sciences of the*  
568 *United States of America*, *117*(16), 9001–9012. <https://doi.org/10.1073/pnas.1922501117>
- 569 Chiang, C. W. K., Derti, A., Schwartz, D., Chou, M. F., Hirschhorn, J. N., & Wu, C. T. (2008).  
570 Ultraconserved elements: Analyses of dosage sensitivity, motifs and boundaries. *Genetics*,  
571 *180*(4), 2277–2293. <https://doi.org/10.1534/genetics.108.096537>
- 572 Cipriani, V., Silva, R. S., Arno, G., Pontikos, N., Kalhor, A., Valeina, S., Inashkina, I., Audere, M., ...  
573 Moore, A. T. (2017). Duplication events downstream of IRX1 cause North Carolina macular  
574 dystrophy at the MCDR3 locus. *Scientific Reports*, *7*(1), 1–9. <https://doi.org/10.1038/s41598-017-06387-6>
- 576 Clark, B. S., Stein-O'Brien, G. L., Shiao, F., Cannon, G. H., Davis-Marcisak, E., Sherman, T., Santiago, C.  
577 P., Hoang, T. V., ... Blackshaw, S. (2019). Single-Cell RNA-Seq Analysis of Retinal Development  
578 Identifies NFI Factors as Regulating Mitotic Exit and Late-Born Cell Specification. *Neuron*, *102*(6),  
579 1111-1126.e5. <https://doi.org/10.1016/j.neuron.2019.04.010>

580 Collinson, J. M., Quinn, J. C., Hill, R. E., & West, J. D. (2003). The roles of Pax6 in the cornea, retina,  
581 and olfactory epithelium of the developing mouse embryo. *Developmental Biology*, 255(2),  
582 303–312. [https://doi.org/10.1016/S0012-1606\(02\)00095-7](https://doi.org/10.1016/S0012-1606(02)00095-7)

583 Creyghton, M. P., Cheng, A. W., Welstead, G. G., Kooistra, T., Carey, B. W., Steine, E. J., Hanna, J.,  
584 Lodato, M. A., ... Jaenisch, R. (2010). Histone H3K27ac separates active from poised enhancers  
585 and predicts developmental state. *Proceedings of the National Academy of Sciences of the*  
586 *United States of America*, 107(50), 21931–21936. <https://doi.org/10.1073/pnas.1016071107>

587 Cunha, D. L., Arno, G., Corton, M., & Moosajee, M. (2019). The spectrum of PAX6 mutations and  
588 genotype-phenotype correlations in the eye. *Genes*, 10(12).  
589 <https://doi.org/10.3390/genes10121050>

590 de Bruijn, S. E., Fiorentino, A., Ottaviani, D., Fanucchi, S., Melo, U. S., Corral-Serrano, J. C., Mulders,  
591 T., Georgiou, M., ... Hardcastle, A. J. (2020). Structural Variants Create New Topological-  
592 Associated Domains and Ectopic Retinal Enhancer-Gene Contact in Dominant Retinitis  
593 Pigmentosa. *American Journal of Human Genetics*, 107(5), 802–814.  
594 <https://doi.org/10.1016/j.ajhg.2020.09.002>

595 Dickel, D. E., Ypsilanti, A. R., Pla, R., Zhu, Y., Barozzi, I., Mannion, B. J., Khin, Y. S., Fukuda-Yuzawa, Y.,  
596 ... Visel, A. (2018). Ultraconserved Enhancers Are Required for Normal Development. *Cell*,  
597 172(3), 491-499.e15. <https://doi.org/10.1016/j.cell.2017.12.017>

598 Dimitrieva, S., & Bucher, P. (2013). UCNEbase - A database of ultraconserved non-coding elements  
599 and genomic regulatory blocks. *Nucleic Acids Research*, 41(D1), 101–109.  
600 <https://doi.org/10.1093/nar/gks1092>

601 Dixon, J. R., Selvaraj, S., Yue, F., Kim, A., Li, Y., Shen, Y., Hu, M., Liu, J. S., & Ren, B. (2012). Topological  
602 domains in mammalian genomes identified by analysis of chromatin interactions. *Nature*,  
603 485(7398), 376–380. <https://doi.org/10.1038/nature11082>

604 Drake, J. A., Bird, C., Nemesh, J., Thomas, D. J., Newton-Cheh, C., Reymond, A., Excoffier, L., Attar, H.,  
605 ... Hirschhorn, J. N. (2006). Conserved noncoding sequences are selectively constrained and not  
606 mutation cold spots. *Nature Genetics*, 38(2), 223–227. <https://doi.org/10.1038/ng1710>

607 Dubey, S. K., Mahalaxmi, N., Vijayalakshmi, P., & Sundaresan, P. (2015). Mutational analysis and  
608 genotype-phenotype correlations in southern Indian patients with sporadic and familial aniridia.  
609 *Molecular Vision*, 21(January), 88–97.

610 Dukler, N., Mughal, M. R., Ramani, R., Huang, Y. F., & Siepel, A. (2022). Extreme purifying selection  
611 against point mutations in the human genome. *Nature Communications*, 13(1).  
612 <https://doi.org/10.1038/s41467-022-31872-6>

613 Dunham, I., Kundaje, A., Aldred, S. F., Collins, P. J., Davis, C. A., Doyle, F., Epstein, C. B., Fritze, S., ...  
614 Lochovsky, L. (2012). An integrated encyclopedia of DNA elements in the human genome.  
615 *Nature*, 489(7414), 57–74. <https://doi.org/10.1038/nature11247>

616 Ehrenberg, M., Bagdonite-Bejarano, L., Fulton, A. B., Orenstein, N., & Yahalom, C. (2021). Genetic  
617 causes of nystagmus, foveal hypoplasia and subnormal visual acuity- other than albinism.  
618 *Ophthalmic Genetics*, 42(3), 243–251. <https://doi.org/10.1080/13816810.2021.1888128>

619 Ellingford, J. M., Barton, S., Bhaskar, S., O’Sullivan, J., Williams, S. G., Lamb, J. A., Panda, B.,  
620 Sergouniotis, P. I., ... Black, G. C. M. (2016). Molecular findings from 537 individuals with  
621 inherited retinal disease. *Journal of Medical Genetics*, 53(11), 761–767.  
622 <https://doi.org/10.1136/jmedgenet-2016-103837>

623 Engström, P. G., Fredman, D., & Lenhard, B. (2008). Ancora: A web resource for exploring highly

624 conserved noncoding elements and their association with developmental regulatory genes.  
625 *Genome Biology*, 9(2), 8–11. <https://doi.org/10.1186/gb-2008-9-2-r34>

626 Field, A., & Adelman, K. (2020). Evaluating Enhancer Function and Transcription. *Annual Review of*  
627 *Biochemistry*, 89, 213–234. <https://doi.org/10.1146/annurev-biochem-011420-095916>

628 Georgala, P. A., Carr, C. B., & Price, D. J. (2011). The role of Pax6 in forebrain development.  
629 *Developmental Neurobiology*, 71(8), 690–709. <https://doi.org/10.1002/dneu.20895>

630 Ghiasvand, N. M., Rudolph, D. D., Mashayekhi, M., Brzezinski, J. A., Goldman, D., & Glaser, T. (2011).  
631 Deletion of a remote enhancer near ATOH7 disrupts retinal neurogenesis, causing NCRNA  
632 disease. *Nature Neuroscience*, 14(5), 578–588. <https://doi.org/10.1038/nn.2798>

633 Goodson, N. B., Nahreini, J., Randazzo, G., Uruena, A., Johnson, J. E., & Brzezinski, J. A. (2018).  
634 Prdm13 is required for Ebf3+ amacrine cell formation in the retina. *Developmental Biology*,  
635 434(1), 149–163. <https://doi.org/10.1016/j.ydbio.2017.12.003>

636 Granja, J. M., Corces, M. R., Pierce, S. E., Bagdatli, S. T., Choudhry, H., Chang, H. Y., & Greenleaf, W. J.  
637 (2021). Author Correction: ArchR is a scalable software package for integrative single-cell  
638 chromatin accessibility analysis (*Nature Genetics*, (2021), 53, 3, (403-411), 10.1038/s41588-021-  
639 00790-6). *Nature Genetics*, 53(6), 935. <https://doi.org/10.1038/s41588-021-00850-x>

640 Haer-Wigman, L., Van Zelst-Stams, W. A. G., Pfundt, R., Van Den Born, L. I., Klaver, C. C. W., Verheij, J.  
641 B. G. M., Hoyng, C. B., Breuning, M. H., ... Yntema, H. G. (2017). Diagnostic exome sequencing in  
642 266 Dutch patients with visual impairment. *European Journal of Human Genetics*, 25(5), 591–  
643 599. <https://doi.org/10.1038/ejhg.2017.9>

644 Hoshino, A., Ratnapriya, R., Brooks, M. J., Chaitankar, V., Wilken, M. S., Zhang, C., Starostik, M. R.,  
645 Gieser, L., ... Reh, T. A. (2017). Molecular Anatomy of the Developing Human Retina.  
646 *Developmental Cell*, 43(6), 763–779.e4. <https://doi.org/10.1016/j.devcel.2017.10.029>

647 Hussey, K. A., Hadyniak, S. E., & Johnston, R. J. (2022). Patterning and Development of  
648 Photoreceptors in the Human Retina. *Frontiers in Cell and Developmental Biology*, 10(April), 1–  
649 21. <https://doi.org/10.3389/fcell.2022.878350>

650 Juan, A. H., Wang, S., Ko, K. D., Zare, H., Tsai, P. F., Feng, X., Vivanco, K. O., Ascoli, A. M., ... Sartorelli,  
651 V. (2016). Roles of H3K27me2 and H3K27me3 Examined during Fate Specification of Embryonic  
652 Stem Cells. *Cell Reports*, 17(5), 1369–1382. <https://doi.org/10.1016/j.celrep.2016.09.087>

653 Katzman, S., Kern, A. D., Bejerano, G., Fewell, G., Fulton, L., Wilson, R. K., Salama, S. R., & Haussler, D.  
654 (2007). Human genome ultraconserved elements are ultraselected. *Science*, 317(5840), 915.  
655 <https://doi.org/10.1126/science.1142430>

656 Kimura, J., Suda, Y., Kurokawa, D., Hossain, Z. M., Nakamura, M., Takahashi, M., Hara, A., & Aizawa, S.  
657 (2005). Emx2 and Pax6 function in cooperation with Otx2 and Otx1 to develop caudal forebrain  
658 primordium that includes future archipallium. *Journal of Neuroscience*, 25(21), 5097–5108.  
659 <https://doi.org/10.1523/JNEUROSCI.0239-05.2005>

660 Klopocki, E., Ott, C. E., Benatar, N., Ullmann, R., Mundlos, S., & Lehmann, K. (2008). A  
661 microduplication of the long range SHH limb regulator (ZRS) is associated with triphalangeal  
662 thumb-polysyndactyly syndrome. *Journal of Medical Genetics*, 45(6), 370–375.  
663 <https://doi.org/10.1136/jmg.2007.055699>

664 Kuht, H. J., Han, J., Maconachie, G. D. E., Park, S. E., Lee, S. T., McLean, R., Sheth, V., Hisaund, M., ...  
665 Thomas, M. G. (2020). SLC38A8 mutations result in arrested retinal development with loss of  
666 cone photoreceptor specialization. *Human Molecular Genetics*, 29(18), 2989–3002.  
667 <https://doi.org/10.1093/hmg/ddaa166>

- 668 Kuht, H. J., Maconachie, G. D. E., Han, J., Kessel, L., van Genderen, M. M., McLean, R. J., Hisaund, M.,  
669 Tu, Z., ... Thomas, M. G. (2022). Genotypic and Phenotypic Spectrum of Foveal Hypoplasia: A  
670 Multicenter Study. *Ophthalmology*, *129*(6), 708–718.  
671 <https://doi.org/10.1016/j.ophtha.2022.02.010>
- 672 Kvon, E. Z., Zhu, Y., Kelman, G., Novak, C. S., Plajzer-Frick, I., Kato, M., Garvin, T. H., Pham, Q., ...  
673 Pennacchio, L. A. (2020). Comprehensive In Vivo Interrogation Reveals Phenotypic Impact of  
674 Human Enhancer Variants. *Cell*, *180*(6), 1262–1271.e15.  
675 <https://doi.org/10.1016/j.cell.2020.02.031>
- 676 Lenassi, E., Carvalho, A., Thormann, A., Fletcher, T., Hardcastle, C., Hunt, S. E., Sergouniotis, P. I.,  
677 Michaelides, M., ... Ellingford, J. M. (2021). EyeG2P: an automated variant filtering approach  
678 improves efficiency of diagnostic genomic testing for inherited ophthalmic disorders. *MedRxiv*,  
679 2021.07.23.21261017.  
680 <https://www.medrxiv.org/content/10.1101/2021.07.23.21261017v1%0Ahttps://www.medrxiv.org/content/10.1101/2021.07.23.21261017v1.abstract>
- 682 Lettice, L. A., Heaney, S. J. H., Purdie, L. A., Li, L., de Beer, P., Oostra, B. A., Goode, D., Elgar, G., ... de  
683 Graaff, E. (2003). A long-range Shh enhancer regulates expression in the developing limb and fin  
684 and is associated with preaxial polydactyly. *Human Molecular Genetics*, *12*(14), 1725–1735.  
685 <https://doi.org/10.1093/hmg/ddg180>
- 686 Li, Q., Ritter, D., Yang, N., Dong, Z., Li, H., Chuang, J. H., & Guo, S. (2010). A systematic approach to  
687 identify functional motifs within vertebrate developmental enhancers. *Developmental Biology*,  
688 *337*(2), 484–495. <https://doi.org/10.1016/j.ydbio.2009.10.019>
- 689 Lima Cunha, D., Owen, N., Tailor, V., Corton, M., Theodorou, M., & Moosajee, M. (2021). PAX6  
690 missense variants in two families with isolated foveal hypoplasia and nystagmus: evidence of  
691 paternal postzygotic mosaicism. *European Journal of Human Genetics*, *29*(2), 349–355.  
692 <https://doi.org/10.1038/s41431-020-00737-1>
- 693 Lomonaco, V., Martoglia, R., Mandreoli, F., Anderlucchi, L., Emmett, W., Bicciato, S., & Taccioli, C.  
694 (2014). UCbase 2.0: Ultraconserved sequences database (2014 update). *Database*, *2014*, 1–8.  
695 <https://doi.org/10.1093/database/bau062>
- 696 Long, H. K., Osterwalder, M., Welsh, I. C., Hansen, K., Davies, J. O. J., Liu, Y. E., Koska, M., Adams, A.  
697 T., ... Wysocka, J. (2020). Loss of Extreme Long-Range Enhancers in Human Neural Crest Drives a  
698 Craniofacial Disorder. *Cell Stem Cell*, *27*(5), 765–783.e14.  
699 <https://doi.org/10.1016/j.stem.2020.09.001>
- 700 Lupiáñez, D. G., Kraft, K., Heinrich, V., Krawitz, P., Brancati, F., Klopocki, E., Horn, D., Kayserili, H., ...  
701 Mundlos, S. (2015). Disruptions of topological chromatin domains cause pathogenic rewiring of  
702 gene-enhancer interactions. *Cell*, *161*(5), 1012–1025. <https://doi.org/10.1016/j.cell.2015.04.004>
- 703 Marchal, C., Singh, N., Batz, Z., Advani, J., Jaeger, C., Corso-Díaz, X., & Swaroop, A. (2022). High-  
704 resolution genome topology of human retina uncovers super enhancer-promoter interactions  
705 at tissue-specific and multifactorial disease loci. *Nature Communications*, *13*(1), 1–16.  
706 <https://doi.org/10.1038/s41467-022-33427-1>
- 707 Martin, A. R., Williams, E., Foulger, R. E., Leigh, S., Daugherty, L. C., Niblock, O., Leong, I. U. S., Smith,  
708 K. R., ... McDonagh, E. M. (2019). PanelApp crowdsources expert knowledge to establish  
709 consensus diagnostic gene panels. *Nature Genetics*, *51*(11), 1560–1565.  
710 <https://doi.org/10.1038/s41588-019-0528-2>
- 711 Martínez, F., Monfort, S., Rosellá, M., Oltra, S., Blesa, D., Quiroga, R., Mayo, S., & Orellana, C. (2010).  
712 Enrichment of ultraconserved elements among genomic imbalances causing mental delay and

713 congenital anomalies. *BMC Medical Genomics*, 3. <https://doi.org/10.1186/1755-8794-3-54>

714 McLean, C. Y., Bristor, D., Hiller, M., Clarke, S. L., Schaar, B. T., Lowe, C. B., Wenger, A. M., &  
715 Bejerano, G. (2010). GREAT improves functional interpretation of cis-regulatory regions. *Nature*  
716 *Biotechnology*, 28(5), 495–501. <https://doi.org/10.1038/nbt.1630>

717 Morris, A. C., & Fadool, J. M. (2005). Studying rod photoreceptor development in zebrafish.  
718 *Physiology and Behavior*, 86(3), 306–313. <https://doi.org/10.1016/j.physbeh.2005.08.020>

719 Pachano, T., Haro, E., & Rada-Iglesias, A. (2022). Enhancer-gene specificity in development and  
720 disease. *Development (Cambridge, England)*, 149(11). <https://doi.org/10.1242/dev.186536>

721 Pedersen, H. R., Baraas, R. C., Landsend, E. C. S., Utheim, O. A., Utheim, T. P., Gilson, S. J., & Neitz, M.  
722 (2020). PAX6 genotypic and retinal phenotypic characterization in congenital aniridia.  
723 *Investigative Ophthalmology and Visual Science*, 61(5). <https://doi.org/10.1167/IOVS.61.5.14>

724 Pennacchio, L. A., Ahituv, N., Moses, A. M., Prabhakar, S., Nobrega, M. A., Shoukry, M., Minovitsky,  
725 S., Dubchak, I., ... Rubin, E. M. (2006). In vivo enhancer analysis of human conserved non-coding  
726 sequences. *Nature*, 444(7118), 499–502. <https://doi.org/10.1038/nature05295>

727 Pituello, F., Medevielle, F., Foulquier, F., & Duprat, A. M. (1999). Activation of Pax6 depends on  
728 somitogenesis in the chick embryo cervical spinal cord. *Development*, 126(3), 587–596.  
729 <https://doi.org/10.1242/dev.126.3.587>

730 Plaisancié, J., Tarilonte, M., Ramos, P., Jeanton-Scaramouche, C., Gaston, V., Dollfus, H., Aguilera, D.,  
731 Kaplan, J., ... Corton, M. (2018). Implication of non-coding PAX6 mutations in aniridia. *Human*  
732 *Genetics*, 137(10), 831–846. <https://doi.org/10.1007/s00439-018-1940-x>

733 Polychronopoulos, D., King, J. W. D., Nash, A. J., Tan, G., & Lenhard, B. (2017). Conserved non-coding  
734 elements: Developmental gene regulation meets genome organization. *Nucleic Acids Research*,  
735 45(22), 12611–12624. <https://doi.org/10.1093/nar/gkx1074>

736 Quinlan, A. R., & Hall, I. M. (2010). BEDTools: A flexible suite of utilities for comparing genomic  
737 features. *Bioinformatics*, 26(6), 841–842. <https://doi.org/10.1093/bioinformatics/btq033>

738 Rada-Iglesias, A., Bajpai, R., Swigut, T., Brugmann, S. A., Flynn, R. A., & Wysocka, J. (2011). A unique  
739 chromatin signature uncovers early developmental enhancers in humans. *Nature*, 470(7333),  
740 279–285. <https://doi.org/10.1038/nature09692>

741 Rapaport, D. H., Wong, L. L., Wood, E. D., Yasumura, D., & Lavail, M. M. (2004). Timing and  
742 topography of cell genesis in the rat retina. *Journal of Comparative Neurology*, 474(2), 304–324.  
743 <https://doi.org/10.1002/cne.20134>

744 Raychaudhuri, S., Iartchouk, O., Chin, K., Tan, P. L., Tai, A. K., Ripke, S., Gowrisankar, S., Vemuri, S., ...  
745 Seddon, J. M. (2011). A rare penetrant mutation in CFH confers high risk of age-related macular  
746 degeneration. *Nature Genetics*, 43(12), 1232–1236. <https://doi.org/10.1038/ng.976>

747 Rogers, M. F., Shihab, H. A., Mort, M., Cooper, D. N., Gaunt, T. R., & Campbell, C. (2018). FATHMM-  
748 XF: Accurate prediction of pathogenic point mutations via extended features. *Bioinformatics*,  
749 34(3), 511–513. <https://doi.org/10.1093/bioinformatics/btx536>

750 Santos-Rosa, H., Schneider, R., Bannister, A. J., Sherriff, J., Bernstein, B. E., Emre, N. C. T., Schreiber, S.  
751 L., Mellor, J., & Kouzarides, T. (2002). Active genes are tri-methylated at K4 of histone H3.  
752 *Nature*, 419(6905), 407–411. <https://doi.org/10.1038/nature01080>

753 Schmitt, E. A., & Dowling, J. E. (1999). Early retinal development in the Zebrafish, *Danio rerio*: Light  
754 and electron microscopic analyses. *Journal of Comparative Neurology*, 404(4), 515–536.  
755 [https://doi.org/10.1002/\(SICI\)1096-9861\(19990222\)404:4<515::AID-CNE8>3.0.CO;2-A](https://doi.org/10.1002/(SICI)1096-9861(19990222)404:4<515::AID-CNE8>3.0.CO;2-A)

- 756 Schwarz, J. M., Hombach, D., Köhler, S., Cooper, D. N., Schuelke, M., & Seelow, D. (2019).  
757 RegulationSpotter: Annotation and interpretation of extratranscriptomic DNA variants. *Nucleic*  
758 *Acids Research*, 47(W1), W106–W113. <https://doi.org/10.1093/nar/gkz327>
- 759 Shi, F.-Y., Wang, Y., Huang, D., Liang, Y., Liang, N., Chen, X.-W., & Gao, G. (2021). Computational  
760 Assessment of the Expression-modulating Potential for Noncoding Variants. *Genomics,*  
761 *Proteomics & Bioinformatics*, 86. <https://doi.org/10.1016/j.gpb.2021.10.003>
- 762 Small, K. W., DeLuca, A. P., Whitmore, S. S., Rosenberg, T., Silva-Garcia, R., Udar, N., Puech, B., Garcia,  
763 C. A., ... Stone, E. M. (2016). North Carolina Macular Dystrophy Is Caused by Dysregulation of  
764 the Retinal Transcription Factor PRDM13. *Ophthalmology*, 123(1), 9–18.  
765 <https://doi.org/10.1016/j.ophtha.2015.10.006>
- 766 Smedley, D., Smith, K. R., Martin, A., Thomas, E. A., McDonagh, E. M., Cipriani, V., Ellingford, J. M.,  
767 Arno, G., ... Caulfield, M. (2021). 100,000 Genomes Pilot on Rare-Disease Diagnosis in Health  
768 Care — Preliminary Report. *New England Journal of Medicine*, 385(20), 1868–1880.  
769 <https://doi.org/10.1056/nejmoa2035790>
- 770 Snetkova, V., Pennacchio, L. A., Visel, A., & Dickel, D. E. (2021). Perfect and imperfect views of  
771 ultraconserved sequences. *Nature Reviews Genetics*, 0123456789.  
772 <https://doi.org/10.1038/s41576-021-00424-x>
- 773 Snetkova, V., Ypsilanti, A. R., Akiyama, J. A., Mannion, B. J., Plajzer-Frick, I., Novak, C. S., Harrington,  
774 A. N., Pham, Q. T., ... Dickel, D. E. (2021). Ultraconserved enhancer function does not require  
775 perfect sequence conservation. *Nature Genetics*, 53(4), 521–528.  
776 <https://doi.org/10.1038/s41588-021-00812-3>
- 777 Spielmann, M., & Mundlos, S. (2016). Looking beyond the genes: The role of non-coding variants in  
778 human disease. *Human Molecular Genetics*, 25(R2), R157–R165.  
779 <https://doi.org/10.1093/hmg/ddw205>
- 780 Taylor, R. L., Poulter, J. A., Downes, S. M., McKibbin, M., Khan, K., Inglehearn, C. F., Webster, A. R.,  
781 Hardcastle, A. J., ... van Heyningen, V. (2019). Loss-of-Function Mutations in the CFH Gene  
782 Affecting Alternatively Encoded Factor H-like 1 Protein Cause Dominant Early-Onset Macular  
783 Drusen. *Ophthalmology*, 126(10), 1410–1421. <https://doi.org/10.1016/j.ophtha.2019.03.013>
- 784 Thomas, E. D., Timms, A. E., Giles, S., Harkins-Perry, S., Lyu, P., Hoang, T., Qian, J., Jackson, V. E., ...  
785 Cherry, T. J. (2022). Cell-specific cis-regulatory elements and mechanisms of non-coding genetic  
786 disease in human retina and retinal organoids. *Developmental Cell*, 57(6), 820-836.e6.  
787 <https://doi.org/10.1016/j.devcel.2022.02.018>
- 788 Thormann, A., Halachev, M., McLaren, W., Moore, D. J., Svinti, V., Campbell, A., Kerr, S. M.,  
789 Tischkowitz, M., ... FitzPatrick, D. R. (2019). Flexible and scalable diagnostic filtering of genomic  
790 variants using G2P with Ensembl VEP. *Nature Communications*, 10(1), 1–10.  
791 <https://doi.org/10.1038/s41467-019-10016-3>
- 792 Turner, D. L., & Cepko, C. L. (1988). A common progenitor for neurons and glia persists in rat retina  
793 late in development. *Nature*, 328(6126), 131–136. <https://doi.org/10.1038/328131a0>
- 794 Turner, D. L., Snyder, E. Y., & Cepko, C. L. (1990). Lineage-independent determination of cell type in  
795 the embryonic mouse retina. *Neuron*, 4(6), 833–845. [https://doi.org/10.1016/0896-6273\(90\)90136-4](https://doi.org/10.1016/0896-6273(90)90136-4)
- 797 Van de Sompele, S., Small, K. W., Cicekdal, M. B., Soriano, V. L., D'haene, E., Shaya, F. S., Agemy, S.,  
798 Van der Snickt, T., ... De Baere, E. (2022). Multi-omics approach dissects cis-regulatory  
799 mechanisms underlying North Carolina macular dystrophy, a retinal enhanceropathy. *American*



800 *Journal of Human Genetics*, 109(11), 2029–2048. <https://doi.org/10.1016/j.ajhg.2022.09.013>

801 Visel, A., Minovitsky, S., Dubchak, I., & Pennacchio, L. A. (2007). VISTA Enhancer Browser - A database  
802 of tissue-specific human enhancers. *Nucleic Acids Research*, 35(SUPPL. 1), 88–92.  
803 <https://doi.org/10.1093/nar/gkl822>

804 Watanabe, S., Sanuki, R., Sugita, Y., Imai, W., Yamazaki, R., Kozuka, T., Ohsuga, M., & Furukawa, T.  
805 (2015). Prdm13 regulates subtype specification of retinal amacrine interneurons and modulates  
806 visual sensitivity. *Journal of Neuroscience*, 35(20), 8004–8020.  
807 <https://doi.org/10.1523/JNEUROSCI.0089-15.2015>

808 Whittaker, D. E., Oleari, R., Gregory, L. C., Le Quesne-Stabej, P., Williams, H. J., Torpiano, J. G.,  
809 Formosa, N., Cachia, M. J., ... Dattani, M. T. (2021). A recessive PRDM13 mutation results in  
810 congenital hypogonadotropic hypogonadism and cerebellar hypoplasia. *Journal of Clinical*  
811 *Investigation*, 131(24). <https://doi.org/10.1172/JCI141587>

812 Wieczorek, D., Pawlik, B., Li, Y., Akarsu, N. A., Caliebe, A., May, K. J. W., Schweiger, B., Vargas, F. R., ...  
813 Wollnik, B. (2010). A specific mutation in the distant sonic hedgehog (SHH) cis-regulator (ZRS)  
814 causes Werner Mesomelic Syndrome (WMS) while complete ZRS duplications underlie Haas  
815 type polysyndactyly and preaxial polydactyly (PPD) with or without triphalangeal thumb.  
816 *Human Mutation*, 31(1), 81–89. <https://doi.org/10.1002/humu.21142>

817 Woolfe, A., Goode, D. K., Cooke, J., Callaway, H., Smith, S., Snell, P., McEwen, G. K., & Elgar, G. (2007).  
818 CONDOR: A database resource of developmentally associated conserved non-coding elements.  
819 *BMC Developmental Biology*, 7, 1–11. <https://doi.org/10.1186/1471-213X-7-100>

820 Xie, Z., Bailey, A., Kuleshov, M. V., Clarke, D. J. B., Evangelista, J. E., Jenkins, S. L., Lachmann, A.,  
821 Wojciechowicz, M. L., ... Ma'ayan, A. (2021). Gene Set Knowledge Discovery with Enrichr.  
822 *Current Protocols*, 1(3), 1–51. <https://doi.org/10.1002/cpz1.90>

823 Yokoi, T., Nishina, S., Fukami, M., Ogata, T., Hosono, K., Hotta, Y., & Azuma, N. (2016). Genotype–  
824 phenotype correlation of PAX6 gene mutations in aniridia. *Human Genome Variation*, 3(1), 1–5.  
825 <https://doi.org/10.1038/HGV.2015.52>

826 Zhang, Y., Liu, T., Meyer, C. A., Eeckhoute, J., Johnson, D. S., Bernstein, B. E., Nussbaum, C., Myers, R.  
827 M., ... Shirley, X. S. (2008). Model-based analysis of CHIP-Seq (MACS). *Genome Biology*, 9(9).  
828 <https://doi.org/10.1186/gb-2008-9-9-r137>

829 Zhou, J., & Troyanskaya, O. G. (2015). Predicting effects of noncoding variants with deep learning-  
830 based sequence model. *Nature Methods*, 12(10), 931–934.  
831 <https://doi.org/10.1038/nmeth.3547>

832

A

V1 - chr11:31968001T>C  
 V2 - CFH:c.1187A>G (p.Asn396Ser)

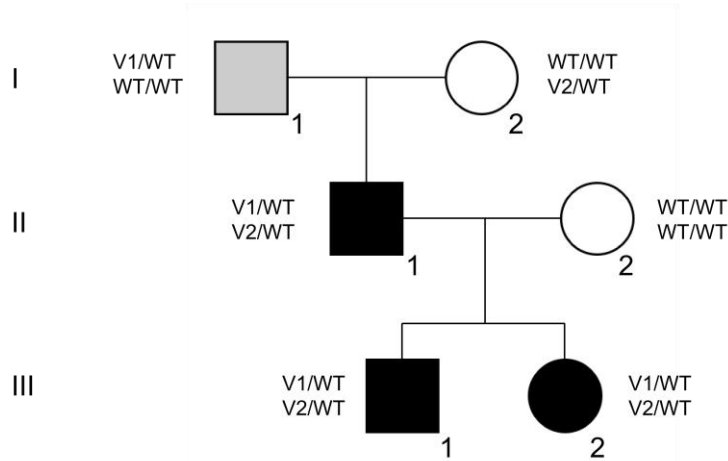

B

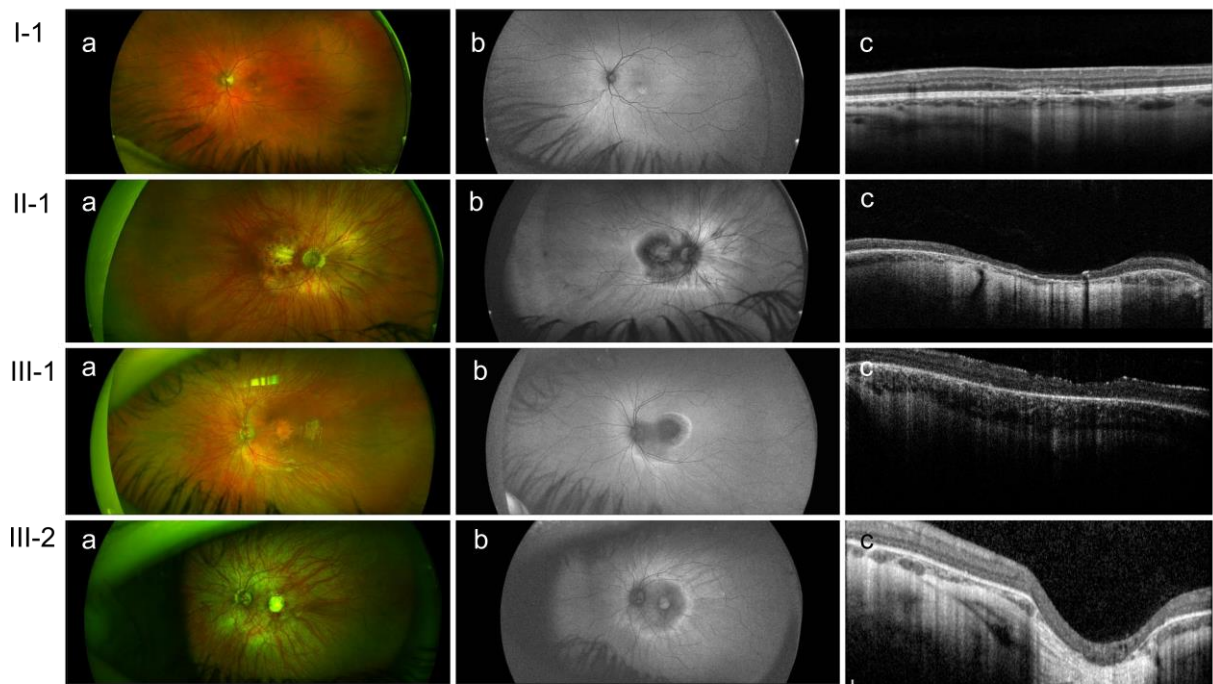

834

835 **Figure S1. PAX6-associated variant exclusively found in a family presenting foveal anomalies.** A)  
 836 Pedigree of the family, indicating segregation of the *PAX6*-associated UCNE variant (V1) and of the *CFH*  
 837 variant (V2). B) Ophthalmological assessment (fundus examination, FAF, and OCT) revealed tessellated  
 838 fundi with atrophic areas at the macula involving the fovea in II-1, III-1 and III-2, while I-1 displayed  
 839 only an area of pallor inferior to the left fovea and corresponding hyper-autofluorescence (see Table  
 840 S7).

A

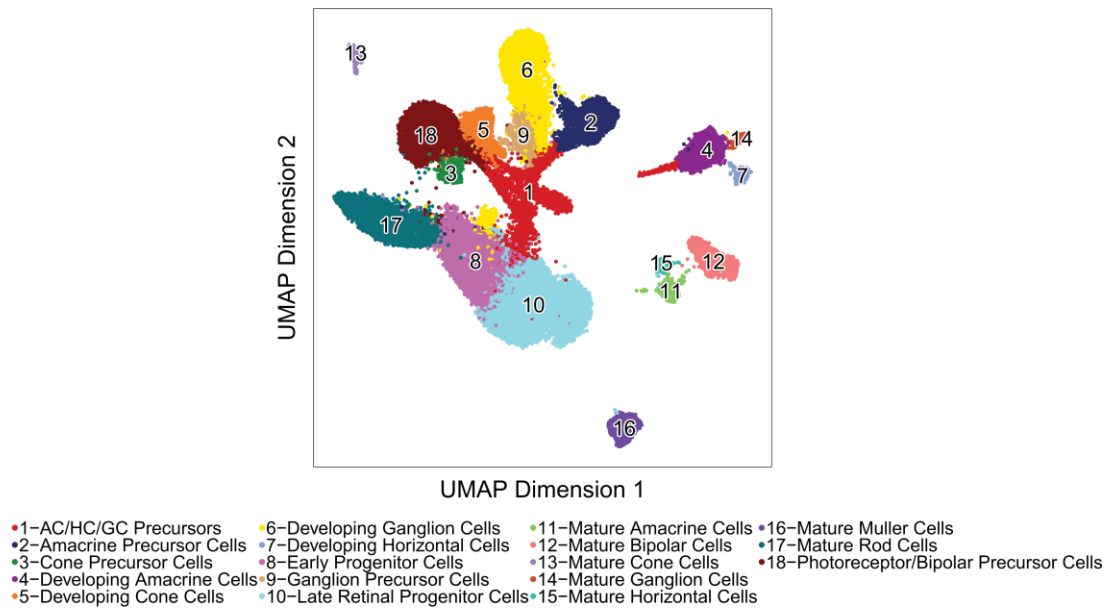

B

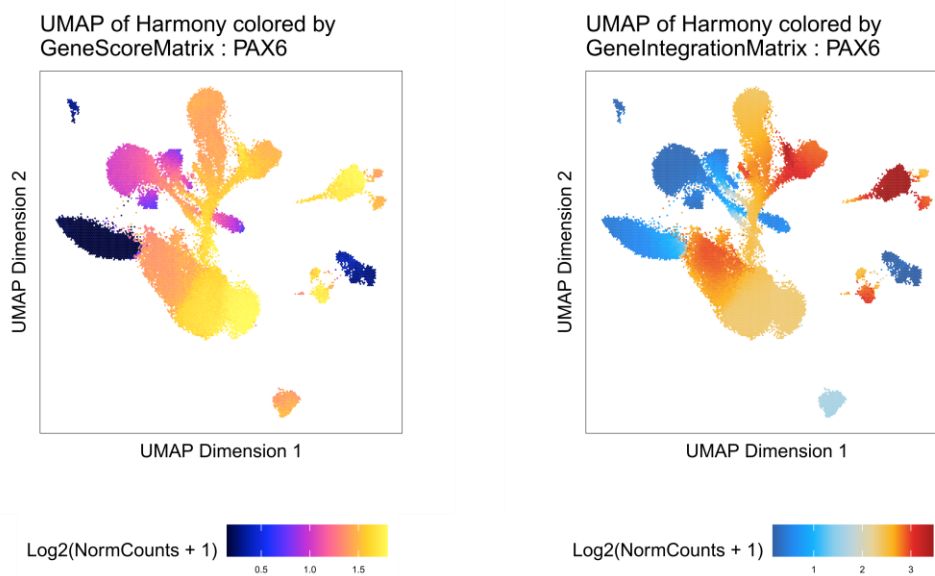

841

842 **Figure S2. Single-cell characterization of the *PAX6* gene.** A) UMAP of the analyzed single cell dataset  
 843 (Thomas et al., 2022). B) Feature plots (scATAC-seq and scRNA-seq) for the *PAX6* locus.

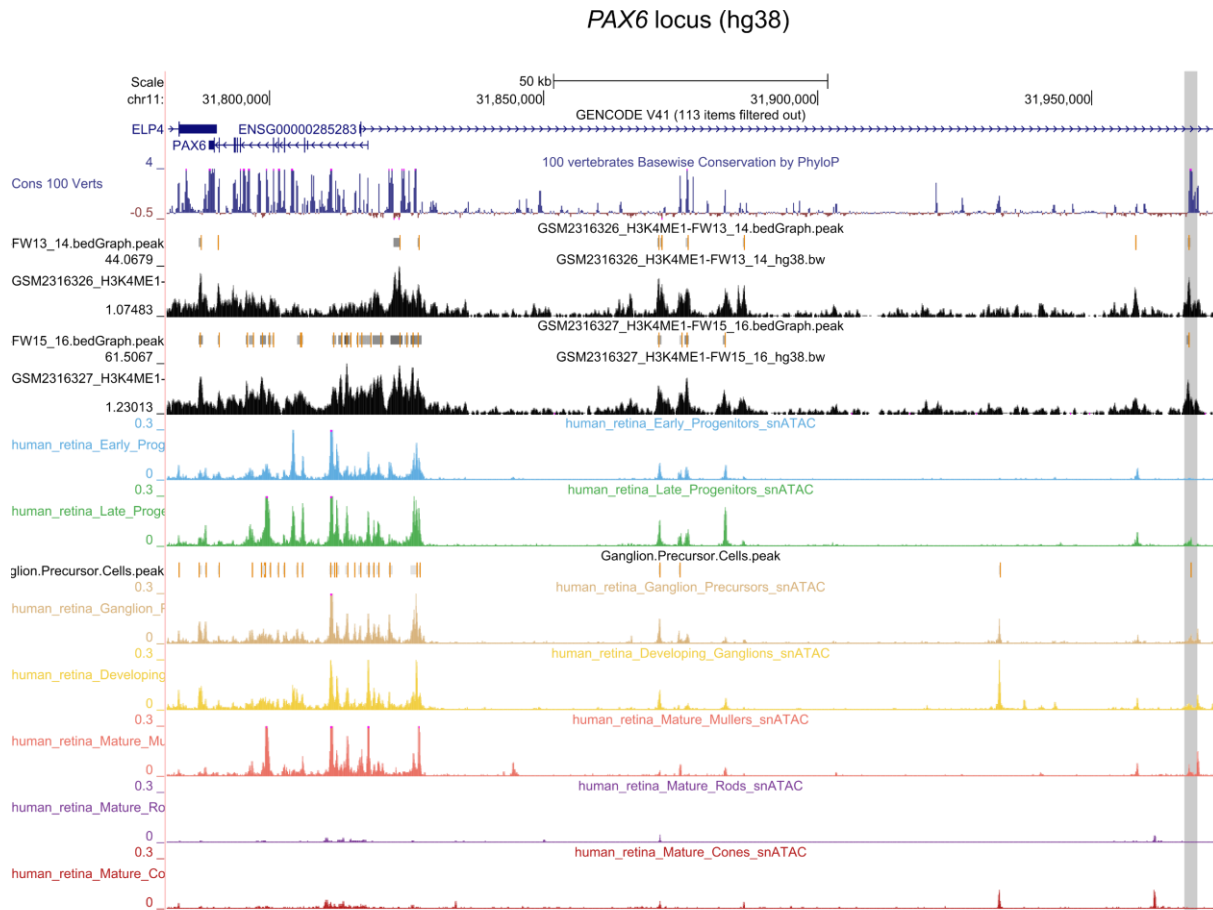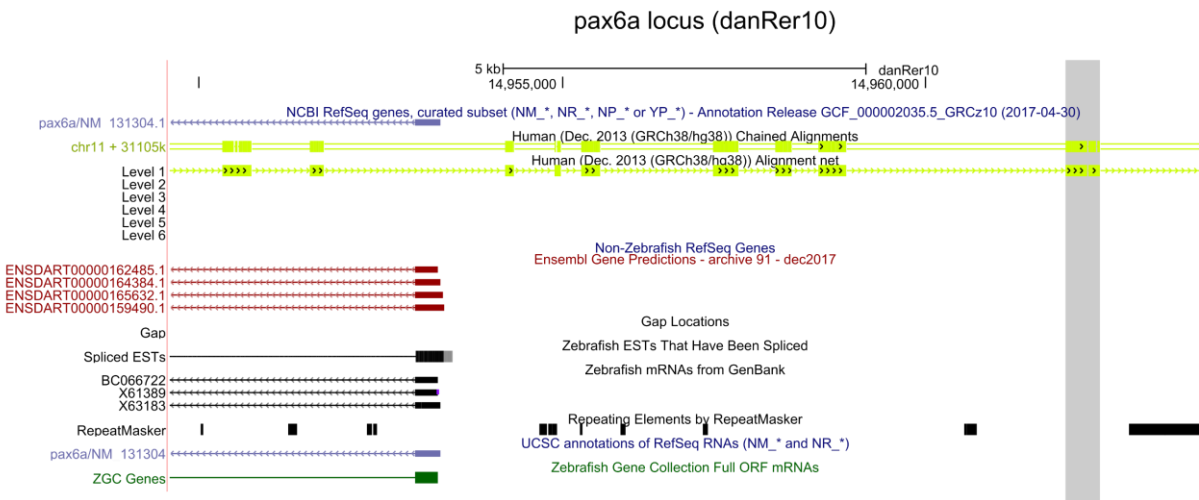

844

845 **Figure S3. Syntenic region in zebrafish of the human *PAX6* locus.** Location of the characterized UCNE  
 846 (in gray) linked to *PAX6*, found exclusively in the *pax6a* locus of zebrafish at a shorter distance ( $\approx 15$ kb)  
 847 when compared to the human *PAX6* locus ( $\approx 150$ kb) with respect to the *PAX6* transcription start site.

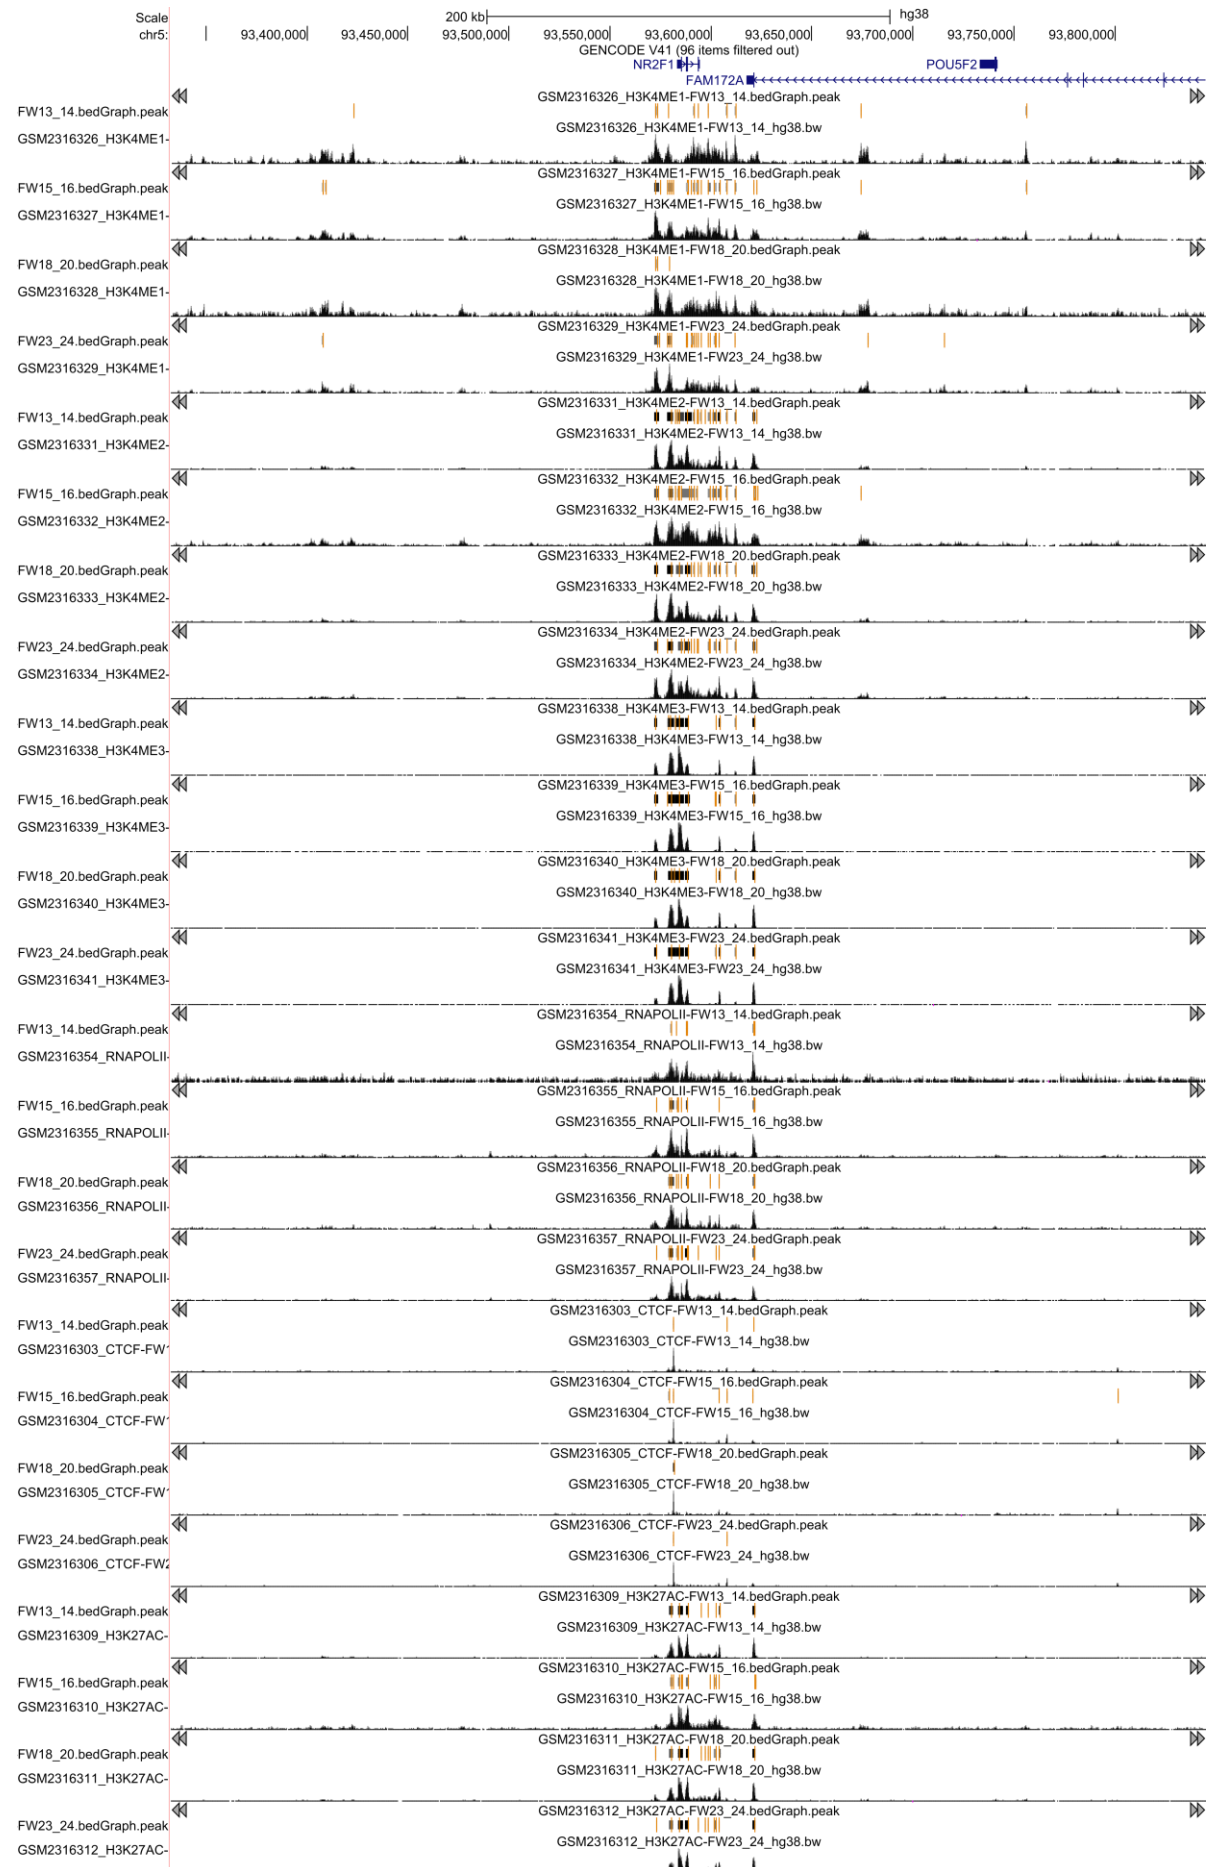

849 **Figure S4. Illustration of the peak identification of scATAC-seq and ChIP-seq data. A)** Peak  
850 identification within the *NR2F1* locus for the following marks: H3K4me1, H3K4me2, H3K4me3, CTCF,  
851 RNAPolIII and H3K27ac across the different time points.

852 **Table S1. Characterization of UCNEs based on:** **UCNE ID** – UCNE name extracted from the original  
853 library elaborated by Dimitrieva et al., 2013; **g.coordinates (hg38)** – genomic coordinate of the UCNE;  
854 **Target gene** – gene association extracted from GREAT analysis; **Bulk RNA-seq (target gene mean  
855 expression)** – expression value (TPM) obtained from the RNA-seq based on samples related to the  
856 human retinal development from Hoshino et al., 2018; **Bulk RNA-seq (target gene expression rank)** –  
857 expression rank obtained from the RNA-seq based on samples related to the human retinal  
858 development from Hoshino et al., 2018; **Bulk RNA-seq (target gene maximum expression)** – maximum  
859 values of gene expression (TPM) obtained from the RNA-seq based on samples related to the human  
860 retinal development from Hoshino et al., 2018; **Bulk RNA-seq (stage of maximum target gene  
861 expression)** – stage where the maximum levels of gene expression were observed, obtained from the  
862 RNA-seq based on samples related to the human retinal development from Hoshino et al., 2018;  
863 **scRNA-seq target gene expression** – characterization of the cell identity where the expression pattern  
864 of the target gene is expected, to perform correlation between enhancer-target gene, obtained from  
865 the scRNA-seq based on samples related to human retinas from Thomas et al., 2022; **DNase-seq (stage)**  
866 – specific stages where the open chromatin context was identified, obtained from the DNase-seq  
867 experiments related to the retinal development from ENCODE; **scATAC-seq** – cell clusters where the  
868 peak identification was retrieved; **Retinal TAD Support** – qualitative estimation of the association  
869 UCNE-target gene; **ChIP-seq** - epigenomic marks, CTCFs and PolII peaks observed within the genomic  
870 context of the characterized UCNE; **VISTA (Element ID)** – assessment of the inclusion of the UCNE  
871 element within the VISTA enhancer browser and its unique ID; **VISTA (Assay result)** – reporter assay  
872 result from the VISTA enhancer browser; **VISTA (Expression pattern)** – includes the tissues where the  
873 expression pattern for the reporter assay was observed.

874 **Table S2. Characterization of UCNEs based on chromatin accessibility.** **UCNE\_id** – Ultraconserved  
875 non-coding element name; **Stage** – retinal development stages where a peak from DNase is retrieved;  
876 **#Stages** – number of stages for the specific element where it was retrieved; **scATAC-seq** – cell cluster  
877 where the peak identification was retrieved; **#Peaks** – total number of cell clusters where the peak  
878 identification was retrieved.

879 **Table S3. Characterization of UCNEs based on epigenomic marks.**

880 **Table S4. Disease association of UCNE target genes.** Gene; UCNE\_id; g.coordinates; #OMIM disease  
881 name; confidence category; allelic requirement; mutation consequence; phenotypes; organ specificity  
882 list; PMIDs.

883 **Table S5. Overview of the eye disease sub-cohort of 100,000 Genomes Project (Genomics England).**  
884 **Normalized Disease Group; Normalized Disease Sub Group; Normalized Specific Disease; Participant  
885 Count.**

886 **Table S6. Variants retrieved within the UCNEs that are linked to an eye or retinal disease phenotype.**  
887 It includes the **gene**, the **UCNE\_id** or name and the retrieved **variant** (hg38).

888 **Table S7. Phenotypic description of the studied family segregating autosomal dominant foveal  
889 abnormalities.** **Participant information** (ID, origin and sex), the **molecular findings** (carriers of the V1  
890 (chr11:31968001T>C) and/or V2 (CFH, c.1187A>G (p.Asn396Ser)), **diagnosis and age of onset** (Clinical  
891 diagnosis, Age at diagnosis, Age of onset visual field loss, Age of onset BCVA loss) and **clinical findings**  
892 (Age at examination, Slit-lamp examination, BCVA OD/OS (LogMAR), Fundus Examination, Visual field,  
893 FAF, OCT, Other findings).

894 **Table S8. Analysis of the TFBS motif disruption potentially exerted by the chr11:31968001T>C variant  
895 (qBiC-PRED) and retrieved variants within genes associated with macular developmental defects and**

896 **foveal hypoplasia (*IRX1*, *PRMD13*, *SLC38A8*, *GPR143*, *FRMD7* and *AHR*).** All coordinates are in the  
897 hg38 assembly.

898 **Table S9. Set of primers used in this study for cloning and segregation.**

899 **Table S10. Overview of the transgenic enhancer assays in zebrafish for the *PAX6*-associated UCNE.**
